# Supplementary material for: Electronic properties and collision cross sections of AgOkHm± (k, m = 1–4) aerosol ionic clusters
Source: Royal Society of Chemistry journal article supplement (doi:10.1039/d3cp05499c), 2024-01-01
Supplement: d3cp05499c1.pdf [file d3cp05499c1.pdf]

# Electronic properties and collision cross sections the $\text{AgO}_k\text{H}_m^\pm$ ( $k, m = 1 - 4$ ) aerosol ionic clusters (Electronic Supplementary Information)

**Mohsen Doust Mohammadi,<sup>a</sup> Somnath Bhowmick,<sup>a,\*</sup> Anne Maisser,<sup>a</sup> Andreas  
Schmidt-Ott,<sup>a,b</sup> and George Biskos<sup>a,c,\*</sup>**

<sup>a</sup> *Climate & Atmosphere Research Centre, The Cyprus Institute, Nicosia 2121, Cyprus.*

<sup>b</sup> *Faculty of Applied Sciences, Delft University of Technology, Delft, 2629 HZ, The Netherlands.*

<sup>c</sup> *Faculty of Civil Engineering and Geosciences, Delft University of Technology, Delft, 2628 CN, The  
Netherlands.*

E-mail: s.bhowmick@cyi.ac.cy; g.biskos@cyi.ac.cy

Phone: +357 22 208618. Fax: +357 22208625

**Table S1**

The cartesian coordinates (in Å) of the  $\text{AgO}_k\text{H}_m^{\pm}$  clusters, where  $k, m = 1 - 4$ , obtained from the geometry optimization calculations at the CCSD level.

---

**AgOH<sup>+</sup>**

---

|    |             |             |            |
|----|-------------|-------------|------------|
| Ag | 0.01333000  | -0.38559000 | 0.00000000 |
| H  | -0.73288000 | 2.57842000  | 0.00000000 |
| O  | 0.01333000  | 1.94305000  | 0.00000000 |

---

**AgOH<sub>2</sub><sup>+</sup>**

---

|    |             |             |            |
|----|-------------|-------------|------------|
| Ag | 0.00000000  | 0.41741000  | 0.00000000 |
| H  | 0.77397000  | -2.42234000 | 0.00000000 |
| H  | -0.77397000 | -2.42234000 | 0.00000000 |
| O  | 0.00000000  | -1.84669000 | 0.00000000 |

---

**AgOH<sub>3</sub><sup>+</sup>**

---

|    |             |             |             |
|----|-------------|-------------|-------------|
| Ag | -0.37413000 | -0.00004000 | 0.00003000  |
| H  | 2.41821000  | -0.77598000 | 0.00249000  |
| H  | 2.41794000  | 0.77629000  | 0.00249000  |
| H  | -2.00672000 | 0.00102000  | -0.00007000 |
| O  | 1.84435000  | 0.00006000  | -0.00079000 |

---

**AgOH<sub>4</sub><sup>+</sup>**

---

|    |             |             |             |
|----|-------------|-------------|-------------|
| Ag | 0.32770000  | 0.00021000  | 0.00005000  |
| H  | 2.32823000  | -0.00176000 | 0.38010000  |
| H  | -2.46399000 | -0.77663000 | 0.00071000  |
| H  | -2.46441000 | 0.77541000  | -0.00022000 |
| H  | 2.32804000  | -0.00365000 | -0.38118000 |
| O  | -1.89124000 | -0.00044000 | -0.00019000 |

---

**AgO<sub>2</sub>H<sup>+</sup>**

---

|    |             |             |             |
|----|-------------|-------------|-------------|
| Ag | 0.72043000  | -0.02834000 | -0.00001000 |
| H  | -3.21988000 | -0.09012000 | 0.00005000  |
| O  | -2.30764000 | -0.45131000 | 0.00003000  |
| O  | -1.52242000 | 0.62910000  | 0.00002000  |

---

**AgO<sub>2</sub>H<sub>2</sub><sup>+</sup>**

---

|    |             |             |             |
|----|-------------|-------------|-------------|
| Ag | -0.67570000 | -0.00002000 | 0.00000000  |
| H  | 2.29433000  | -1.03173000 | -0.60076000 |
| H  | 2.29336000  | 1.03237000  | 0.60106000  |
| O  | 1.69828000  | -0.72878000 | 0.10635000  |
| O  | 1.69797000  | 0.72883000  | -0.10638000 |

---

**AgO<sub>2</sub>H<sub>3</sub><sup>+</sup>**

---

|    |             |             |             |
|----|-------------|-------------|-------------|
| Ag | -0.03777000 | 0.00675000  | 0.00005000  |
| H  | 2.75221000  | -0.78820000 | -0.00524000 |
| H  | 2.76980000  | 0.76368000  | 0.00579000  |
| H  | -2.91355000 | 0.64673000  | -0.01126000 |
| O  | 2.18895000  | -0.00568000 | -0.00043000 |
| O  | -2.29312000 | -0.11174000 | 0.00146000  |

---

**AgO<sub>2</sub>H<sub>4</sub><sup>+</sup>**

---

|    |            |             |             |
|----|------------|-------------|-------------|
| Ag | 0.00001000 | 0.00004000  | 0.00002000  |
| H  | 2.80149000 | -0.55364000 | 0.54368000  |
| H  | 2.80085000 | 0.55024000  | -0.54756000 |

---

|   |             |             |             |
|---|-------------|-------------|-------------|
| H | -2.80202000 | 0.54878000  | 0.54786000  |
| H | -2.80045000 | -0.55035000 | -0.54809000 |
| O | -2.22977000 | 0.00002000  | -0.00011000 |
| O | 2.22974000  | 0.00038000  | 0.00049000  |

-----  
 $\text{AgO}_3\text{H}^+$   
 -----

|    |             |             |             |
|----|-------------|-------------|-------------|
| Ag | 0.87471000  | -0.00270000 | 0.00001000  |
| H  | -1.99991000 | 1.79812000  | 0.00134000  |
| O  | -2.17855000 | -0.15463000 | 0.00004000  |
| O  | -1.33139000 | 1.08570000  | -0.00028000 |
| O  | -1.37901000 | -1.13997000 | 0.00000000  |

-----  
 $\text{AgO}_3\text{H}_2^+$   
 -----

|    |             |             |             |
|----|-------------|-------------|-------------|
| Ag | 0.30313000  | 0.03598000  | -0.00007000 |
| H  | 3.11529000  | -0.16969000 | 0.77527000  |
| H  | 3.11564000  | -0.16551000 | -0.77495000 |
| O  | -2.11502000 | 0.41551000  | 0.00064000  |
| O  | -2.98698000 | -0.43993000 | -0.00039000 |
| O  | 2.54223000  | -0.14506000 | 0.00009000  |

-----  
 $\text{AgO}_3\text{H}_3^+$   
 -----

|    |             |             |             |
|----|-------------|-------------|-------------|
| Ag | -0.29959000 | -0.07671000 | 0.00001000  |
| H  | -3.07740000 | 0.28467000  | 0.77577000  |
| H  | -3.07740000 | 0.28419000  | -0.77583000 |
| H  | 3.58016000  | 0.31765000  | -0.00001000 |
| O  | -2.50592000 | 0.25758000  | -0.00002000 |
| O  | 1.94373000  | -0.52770000 | 0.00003000  |
| O  | 2.64410000  | 0.60998000  | -0.00004000 |

-----  
 $\text{AgO}_3\text{H}_4^+$   
 -----

|    |             |             |             |
|----|-------------|-------------|-------------|
| Ag | 0.29839000  | -0.10409000 | 0.00559000  |
| H  | 3.14618000  | -0.10093000 | -0.61082000 |
| H  | -3.01258000 | 0.88375000  | -0.67781000 |
| H  | -2.43888000 | -1.01035000 | 0.65002000  |
| H  | 2.97399000  | 0.91567000  | 0.54817000  |
| O  | -2.38478000 | 0.81623000  | 0.06190000  |
| O  | -1.95269000 | -0.57934000 | -0.07315000 |
| O  | 2.50083000  | 0.28863000  | -0.01027000 |

-----  
 $\text{AgO}_4\text{H}^+$   
 -----

|    |             |             |             |
|----|-------------|-------------|-------------|
| Ag | 0.00182000  | -0.03478000 | -0.00015000 |
| H  | -3.90983000 | 0.19772000  | 0.00068000  |
| O  | 2.38906000  | 0.52095000  | -0.00044000 |
| O  | 3.31622000  | -0.27455000 | 0.00053000  |
| O  | -2.24321000 | -0.58909000 | 0.00002000  |
| O  | -2.98404000 | 0.52231000  | 0.00065000  |

-----  
 $\text{AgO}_4\text{H}_2^+$   
 -----

|    |             |             |             |
|----|-------------|-------------|-------------|
| Ag | -0.46825000 | -0.07555000 | 0.00006000  |
| H  | -3.16802000 | 1.04094000  | 0.00103000  |
| H  | -3.35287000 | -0.49851000 | -0.00070000 |
| O  | -2.69148000 | 0.20292000  | 0.00017000  |
| O  | 2.53287000  | 0.02616000  | -0.00022000 |
| O  | 1.76842000  | -0.99996000 | -0.00006000 |
| O  | 1.95627000  | 1.14693000  | -0.00026000 |

-----  
 $\text{AgO}_4\text{H}_3^+$   
 -----

|    |             |             |             |
|----|-------------|-------------|-------------|
| Ag | -0.55648000 | 0.08167000  | 0.00595000  |
| H  | -1.61113000 | -2.63456000 | 0.56793000  |
| H  | -0.29248000 | 2.88510000  | -0.74702000 |
| H  | -0.03133000 | 2.84777000  | 0.78000000  |
| O  | -0.15771000 | 2.29285000  | 0.00182000  |
| O  | 2.03680000  | -0.81115000 | 0.31819000  |
| O  | 2.98611000  | -0.30262000 | -0.25818000 |
| O  | -1.35399000 | -2.04616000 | -0.17189000 |

-----  
 $\text{AgO}_4\text{H}_4^+$   
 -----

|    |             |             |             |
|----|-------------|-------------|-------------|
| Ag | 0.57312000  | 0.12638000  | 0.00174000  |
| H  | 0.10124000  | 2.88701000  | -0.79235000 |
| H  | 2.12052000  | -2.35772000 | 0.02328000  |
| H  | 0.62979000  | -2.78649000 | 0.02992000  |
| H  | 0.16240000  | 2.90869000  | 0.75555000  |
| O  | -2.04457000 | -0.89965000 | -0.14610000 |
| O  | 0.11191000  | 2.32448000  | -0.00958000 |
| O  | -3.02833000 | -0.22631000 | 0.11586000  |
| O  | 1.21717000  | -2.02246000 | 0.02756000  |

-----  
 $\text{AgOH}^-$   
 -----

|    |             |             |            |
|----|-------------|-------------|------------|
| Ag | 0.01678700  | -0.35331400 | 0.00000000 |
| H  | -0.92328200 | 2.03586900  | 0.00000000 |
| O  | 0.01678700  | 1.82123900  | 0.00000000 |

-----  
 $\text{AgOH}_2^-$   
 -----

|    |             |             |             |
|----|-------------|-------------|-------------|
| Ag | -0.31053000 | 0.00163000  | -0.00001000 |
| H  | -1.96540000 | 0.03558000  | 0.00020000  |
| H  | 2.17800000  | 0.77602000  | 0.00001000  |
| O  | 1.79778000  | -0.11101000 | 0.00002000  |

-----  
 $\text{AgOH}_3^-$   
 -----

|    |             |             |             |
|----|-------------|-------------|-------------|
| Ag | 0.65673000  | 0.00000000  | -0.00003000 |
| H  | 2.38351000  | 0.00006000  | 0.00100000  |
| H  | -2.82914000 | 0.74367000  | -0.00009000 |
| H  | -2.82898000 | -0.74357000 | -0.00009000 |
| O  | -3.44898000 | -0.00001000 | 0.00007000  |

-----  
 $\text{AgOH}_4^-$   
 -----

|    |             |             |             |
|----|-------------|-------------|-------------|
| Ag | 0.61897000  | -0.01508000 | 0.00000000  |
| H  | -2.81824000 | 0.94130000  | -0.00008000 |
| H  | -0.67402000 | -1.15159000 | -0.00006000 |
| H  | 1.89599000  | 1.11200000  | -0.00001000 |
| H  | -2.31611000 | -0.48064000 | -0.00003000 |
| O  | -3.14739000 | 0.03599000  | 0.00001000  |

-----  
 $\text{AgO}_2\text{H}^-$   
 -----

|    |             |             |             |
|----|-------------|-------------|-------------|
| Ag | -0.04075000 | -0.00217000 | -0.00001000 |
| H  | 2.40389000  | 0.79390000  | 0.00002000  |
| O  | 2.04379000  | -0.10151000 | 0.00002000  |
| O  | -2.10489000 | 0.01502000  | 0.00003000  |

-----  
 $\text{AgO}_2\text{H}_2^-$   
 -----

|    |             |             |             |
|----|-------------|-------------|-------------|
| Ag | 0.00000000  | -0.00256000 | -0.00004000 |
| H  | 2.43803000  | 0.59949000  | -0.52556000 |
| H  | -2.43788000 | 0.60006000  | 0.52521000  |
| O  | -2.08601000 | -0.06749000 | -0.07662000 |

O 2.08599000 -0.06741000 0.07689000

-----  
AgO<sub>2</sub>H<sub>3</sub><sup>-</sup>  
-----

Ag 0.89002000 -0.10398000 0.00002000  
H -3.06423000 -1.19826000 0.38958000  
H -2.52569000 0.15792000 -0.08224000  
H -1.02122000 1.69028000 0.51113000  
O -3.36225000 -0.38814000 -0.03524000  
O -1.04022000 0.91777000 -0.06721000

-----  
AgO<sub>2</sub>H<sub>4</sub><sup>-</sup>  
-----

Ag 0.84376000 -0.07803000 -0.00103000  
H 2.29495000 -0.86243000 0.02800000  
H -3.07866000 -1.21729000 0.38963000  
H -2.52829000 0.13402000 -0.08299000  
H -1.04659000 1.68487000 0.49212000  
O -1.04366000 0.89581000 -0.06137000  
O -3.36861000 -0.40476000 -0.03595000

-----  
AgO<sub>3</sub>H<sup>-</sup>  
-----

Ag 0.26938000 -0.07448000 -0.00062000  
H 2.59936000 0.81564000 -0.61453000  
O 2.33346000 0.20982000 0.08823000  
O -1.81967000 -0.55199000 -0.03995000  
O -2.42132000 0.67781000 0.03219000

-----  
AgO<sub>3</sub>H<sub>2</sub><sup>-</sup>  
-----

Ag -0.32077000 0.08877000 -0.00338000  
H -2.68455000 -0.48690000 0.80677000  
H 2.95130000 -0.63646000 0.74529000  
O -2.35752000 -0.34434000 -0.09013000  
O 1.71980000 0.62607000 0.01818000  
O 2.48891000 -0.66286000 -0.10219000

-----  
AgO<sub>3</sub>H<sub>3</sub><sup>-</sup>  
-----

Ag 0.00756000 -0.20026000 -0.00049000  
H 2.43550000 0.35224000 0.05260000  
H -2.45262000 0.01369000 -0.59513000  
H -0.79924000 2.14009000 0.38098000  
O 0.04779000 1.92564000 -0.03700000  
O 2.03340000 -0.52309000 -0.00913000  
O -2.02355000 -0.53929000 0.06921000

-----  
AgO<sub>3</sub>H<sub>4</sub><sup>-</sup>  
-----

Ag -0.52388000 -0.11374000 -0.00289000  
H -2.54141000 1.35219000 0.58852000  
H 1.49280000 -1.62577000 0.59291000  
H 2.77433000 0.08715000 -0.05847000  
H 3.06594000 1.56835000 0.21536000  
O 3.51510000 0.75340000 -0.02836000  
O 1.41777000 -0.91162000 -0.05020000  
O -2.45406000 0.65370000 -0.07173000

-----  
AgO<sub>4</sub>H<sup>-</sup>  
-----

Ag 0.51164000 -0.12119000 -0.00003000  
H 2.66070000 1.28925000 0.00161000  
O -1.48211000 -1.00753000 0.00015000

|   |             |            |             |
|---|-------------|------------|-------------|
| O | 2.55359000  | 0.32987000 | -0.00011000 |
| O | -1.95051000 | 1.22068000 | -0.00008000 |
| O | -2.45946000 | 0.00780000 | 0.00003000  |

-----  
AgO<sub>4</sub>H<sub>2</sub><sup>-</sup>  
-----

|    |             |             |             |
|----|-------------|-------------|-------------|
| Ag | 0.72468000  | 0.16657000  | -0.00172000 |
| H  | 2.50037000  | -1.50860000 | 0.78432000  |
| H  | -0.55129000 | 2.39285000  | 0.05291000  |
| O  | -2.96684000 | -0.66112000 | -0.61096000 |
| O  | -2.92925000 | -0.70648000 | 0.60787000  |
| O  | 2.28762000  | -1.21221000 | -0.10936000 |
| O  | -0.89263000 | 1.49067000  | 0.01793000  |

-----  
AgO<sub>4</sub>H<sub>3</sub><sup>-</sup>  
-----

|    |             |             |             |
|----|-------------|-------------|-------------|
| Ag | -0.81295000 | -0.04430000 | -0.00295000 |
| H  | 3.05312000  | -0.75972000 | -0.01681000 |
| H  | -3.19484000 | -0.80576000 | 0.54663000  |
| H  | 4.19981000  | 0.18835000  | 0.01620000  |
| O  | 4.02939000  | -0.75993000 | -0.00723000 |
| O  | 1.78837000  | 1.29745000  | 0.02977000  |
| O  | 1.33366000  | 0.02285000  | -0.00800000 |
| O  | -2.88261000 | -0.12799000 | -0.06546000 |

-----  
AgO<sub>4</sub>H<sub>4</sub><sup>-</sup>  
-----

|    |             |             |             |
|----|-------------|-------------|-------------|
| Ag | -0.00003400 | 0.00030300  | 0.00021500  |
| H  | -0.37399900 | -2.34978900 | -0.00113900 |
| H  | 2.35052000  | -0.37488500 | -0.00111300 |
| H  | 0.37338400  | 2.35095800  | 0.00075200  |
| H  | -2.35121600 | 0.37211800  | -0.00096000 |
| O  | -0.50188300 | 1.94226600  | -0.00028500 |
| O  | -1.94205200 | -0.50281700 | -0.00028100 |
| O  | 0.50187200  | -1.94184000 | -0.00001800 |
| O  | 1.94242900  | 0.50080800  | -0.00037300 |

-----

**Table S2**

Zero-point vibrational energy corrected stabilization energy  $\Delta E$  (in eV) of the  $\text{AgO}_k\text{H}_m^{\pm}$  clusters (where  $k, m = 1 - 4$ ) with respect to specific dissociation channels (DCs).

a.  $\text{AgOH}_m^+$ :

| Species           | DC                                              | $\Delta E$ (eV) |
|-------------------|-------------------------------------------------|-----------------|
| $\text{AgOH}^+$   | $\text{Ag}^+ + \text{OH}$                       | 0.86            |
|                   | $\text{AgO}^+ + \text{H}$                       | 5.12            |
|                   | $\text{Ag} + \text{OH}^+$                       | 6.43            |
| $\text{AgOH}_2^+$ | $\text{Ag}^+ + \text{H}_2\text{O}$              | 1.20            |
|                   | $\text{AgOH}^+ + \text{H}$                      | 5.35            |
|                   | $\text{Ag} + \text{H}_2\text{O}^+$              | 6.41            |
|                   | $\text{AgO}^+ + 2\text{H}$                      | 10.48           |
| $\text{AgOH}_3^+$ | $\text{AgOH}_2^+ + \text{H}$                    | 0.57            |
|                   | $\text{AgH}^+ + \text{H}_2\text{O}$             | 1.34            |
|                   | $\text{Ag}^+ + \text{H}_2\text{O} + \text{H}$   | 1.77            |
|                   | $\text{AgH} + \text{H}_2\text{O}^+$             | 4.67            |
|                   | $\text{Ag} + \text{H}_2\text{O}^+ + \text{H}$   | 6.98            |
| $\text{AgOH}_4^+$ | $\text{AgOH}_2^+ + \text{H}_2$                  | 0.41            |
|                   | $\text{AgH}_2^+ + \text{H}_2\text{O}$           | 1.25            |
|                   | $\text{Ag}^+ + \text{H}_2\text{O} + \text{H}_2$ | 1.61            |
|                   | $\text{AgOH}_3^+ + \text{H}$                    | 4.28            |
|                   | $\text{AgH}_2 + \text{H}_2\text{O}^+$           | 6.81            |
|                   | $\text{Ag} + \text{H}_2\text{O}^+ + \text{H}_2$ | 6.82            |
|                   | $\text{AgOH}_2 + \text{H}_2^+$                  | 9.66            |
|                   | $\text{Ag} + \text{H}_2\text{O} + \text{H}_2^+$ | 9.72            |

b.  $\text{AgO}_2\text{H}_m^+$ :

| Species                    | DC                                                      | $\Delta E$ (eV) |
|----------------------------|---------------------------------------------------------|-----------------|
| $\text{AgO}_2\text{H}^+$   | $\text{Ag}^+ + \text{HO}_2$                             | 1.02            |
|                            | $\text{AgO}_2 + \text{H}$                               | 2.80            |
|                            | $\text{AgO}^+ + \text{OH}$                              | 3.61            |
|                            | $\text{Ag} + \text{HO}_2^+$                             | 5.01            |
| $\text{AgO}_2\text{H}_2^+$ | $\text{Ag}^+ + \text{H}_2\text{O}_2$                    | 1.18            |
|                            | $\text{AgOH}^+ + \text{OH}$                             | 2.28            |
|                            | $\text{AgO}_2\text{H}^+ + \text{H}$                     | 3.79            |
|                            | $\text{Ag} + \text{H}_2\text{O}_2^+$                    | 4.76            |
|                            | $\text{AgOH} + \text{OH}^+$                             | 6.32            |
| $\text{AgO}_2\text{H}_3^+$ | $\text{AgOH}_2^+ + \text{OH}$                           | 0.84            |
|                            | $\text{AgOH}^+ + \text{H}_2\text{O}$                    | 1.18            |
|                            | $\text{Ag}^+ + \text{H}_2\text{O} + \text{OH}$          | 2.04            |
|                            | $\text{AgOH} + \text{H}_2\text{O}^+$                    | 4.86            |
|                            | $\text{AgO}^+ + \text{H}_2\text{O} + \text{H}$          | 6.91            |
|                            | $\text{Ag} + \text{H}_2\text{O}^+ + \text{OH}$          | 7.24            |
|                            | $\text{Ag} + \text{H}_2\text{O} + \text{OH}^+$          | 7.61            |
|                            | $\text{AgO} + \text{H}_2\text{O}^+ + \text{H}$          | 10.68           |
| $\text{AgO}_2\text{H}_4^+$ | $\text{AgOH}_2^+ + \text{H}_2\text{O}$                  | 1.14            |
|                            | $\text{Ag}^+ + 2\text{H}_2\text{O}$                     | 2.34            |
|                            | $\text{AgO}_2\text{H}_3^+ + \text{H}$                   | 5.31            |
|                            | $\text{AgOH}^+ + \text{H}_2\text{O} + \text{H}$         | 6.49            |
|                            | $\text{AgOH}_2 + \text{H}_2\text{O}^+$                  | 7.48            |
|                            | $\text{Ag} + \text{H}_2\text{O} + \text{H}_2\text{O}^+$ | 7.54            |

|  |                                                 |       |
|--|-------------------------------------------------|-------|
|  | $\text{AgOH} + \text{H}_2\text{O}^+ + \text{H}$ | 10.16 |
|  | $\text{AgO}^+ + \text{H}_2\text{O} + 2\text{H}$ | 11.62 |
|  | $\text{AgO}_2^+ + 4\text{H}$                    | 15.81 |
|  | $\text{AgO} + \text{H}_2\text{O}^+ + 2\text{H}$ | 16.00 |

c.  $\text{AgO}_3\text{H}_m^+$ :

| Species                    | DC                                                         | $\Delta E$ (eV) |
|----------------------------|------------------------------------------------------------|-----------------|
| $\text{AgO}_3\text{H}^+$   | $\text{AgO}_2^+ + \text{OH}$                               | 0.77            |
|                            | $\text{Ag}^+ + \text{O}_2 + \text{OH}$                     | 1.04            |
|                            | $\text{AgO}_3^+ + \text{H}$                                | 3.78            |
|                            | $\text{Ag}^+ + \text{O}_3 + \text{H}$                      | 4.56            |
|                            | $\text{AgO}^+ + \text{O}_2 + \text{H}$                     | 5.31            |
|                            | $\text{Ag} + \text{O}_2^+ + \text{OH}$                     | 5.67            |
|                            | $\text{AgO}_2 + \text{OH}^+$                               | 6.61            |
|                            | $\text{AgO} + \text{O}_2^+ + \text{H}$                     | 9.12            |
|                            | $\text{Ag} + \text{O}_3^+ + \text{H}$                      | 9.83            |
| $\text{AgO}_3\text{H}_2^+$ | $\text{AgOH}_2^+ + \text{O}_2$                             | 0.26            |
|                            | $\text{AgO}_2^+ + \text{H}_2\text{O}$                      | 1.19            |
|                            | $\text{Ag}^+ + \text{H}_2\text{O} + \text{O}_2$            | 1.47            |
|                            | $\text{AgOH}_2 + \text{O}_2^+$                             | 6.03            |
|                            | $\text{Ag} + \text{H}_2\text{O} + \text{O}_2^+$            | 6.10            |
|                            | $\text{Ag} + \text{H}_2\text{O}^+ + \text{O}_2$            | 6.67            |
|                            | $\text{AgO}_2 + \text{H}_2\text{O}^+$                      | 6.67            |
| $\text{AgO}_3\text{H}_3^+$ | $\text{AgOH}_2^+ + \text{HO}_2$                            | 0.97            |
|                            | $\text{Ag}^+ + \text{H}_2\text{O} + \text{HO}_2$           | 2.17            |
|                            | $\text{AgO}_3\text{H}_2^+ + \text{H}$                      | 2.75            |
|                            | $\text{AgO}^+ + \text{OH} + \text{H}_2\text{O}$            | 4.76            |
|                            | $\text{AgOH}_2 + \text{HO}_2^+$                            | 6.09            |
|                            | $\text{Ag} + \text{H}_2\text{O} + \text{HO}_2^+$           | 6.16            |
|                            | $\text{AgOH}^+ + \text{H} + \text{HO}_2$                   | 6.32            |
|                            | $\text{Ag} + \text{H}_2\text{O}^+ + \text{HO}_2$           | 7.38            |
|                            | $\text{AgOH} + \text{H} + \text{HO}_2^+$                   | 8.78            |
|                            | $\text{AgO} + \text{H}_2\text{O}^+ + \text{OH}$            | 9.14            |
|                            | $\text{AgO} + \text{H}_2\text{O} + \text{OH}^+$            | 9.51            |
|                            | $\text{AgO}^+ + \text{HO}_2 + 2\text{H}$                   | 11.45           |
|                            | $\text{AgO} + \text{HO}_2^+ + 2\text{H}$                   | 14.61           |
| $\text{AgO}_3\text{H}_4^+$ | $\text{AgOH}_2^+ + \text{H}_2\text{O}_2$                   | 1.08            |
|                            | $\text{AgO}_2\text{H}_2^+ + \text{H}_2\text{O}$            | 1.11            |
|                            | $\text{Ag}^+ + \text{H}_2\text{O}_2 + \text{H}_2\text{O}$  | 2.28            |
|                            | $\text{AgOH}^+ + \text{H}_2\text{O} + \text{OH}$           | 3.39            |
|                            | $\text{AgO}_2\text{H}^+ + \text{H}_2\text{O} + \text{H}$   | 4.90            |
|                            | $\text{AgO}_3\text{H}_3^+ + \text{H}$                      | 3.75            |
|                            | $\text{AgOH}_2^+ + \text{H}_2\text{O}_2$                   | 5.80            |
|                            | $\text{Ag} + \text{H}_2\text{O}_2^+ + \text{H}_2\text{O}$  | 5.87            |
|                            | $\text{AgOH}^+ + \text{H}_2\text{O}_2 + \text{H}$          | 6.44            |
|                            | $\text{AgO}_3\text{H}_2^+ + 2\text{H}$                     | 6.51            |
|                            | $\text{AgOH} + \text{H}_2\text{O}^+ + \text{OH}$           | 7.06            |
|                            | $\text{AgOH} + \text{H}_2\text{O} + \text{OH}^+$           | 7.43            |
|                            | $\text{Ag} + \text{H}_2\text{O}_2 + \text{H}_2\text{O}^+$  | 7.49            |
|                            | $\text{AgO}_2^+ + \text{H}_2\text{O} + 2\text{H}$          | 7.70            |
|                            | $\text{AgOH} + \text{H}_2\text{O}_2^+ + \text{H}$          | 8.48            |
|                            | $\text{AgO}^+ + \text{H}_2\text{O} + \text{OH} + \text{H}$ | 8.51            |
|                            | $\text{AgO}_2\text{H} + \text{H}_2\text{O}^+ + \text{H}$   | 9.86            |
|                            | $\text{AgO}^+ + \text{H}_2\text{O}_2 + 2\text{H}$          | 11.56           |
|                            | $\text{AgO} + \text{H}_2\text{O}^+ + \text{OH} + \text{H}$ | 12.89           |



|  |                                                            |       |
|--|------------------------------------------------------------|-------|
|  | $\text{AgO}_2 + \text{H}_2\text{O} + 2\text{H}$            | 13.18 |
|  | $\text{AgO} + \text{H}_2\text{O} + \text{OH}^+ + \text{H}$ | 13.27 |
|  | $\text{AgO} + \text{H}_2\text{O}_2^+ + 2\text{H}$          | 14.32 |

d.  $\text{AgO}_4\text{H}_m^+$ :

| Species                                                     | DC                                                           | $\Delta E$ (eV)                         |       |
|-------------------------------------------------------------|--------------------------------------------------------------|-----------------------------------------|-------|
| $\text{AgO}_4\text{H}^+$                                    | $\text{AgO}_2\text{H}^+ + \text{O}_2$                        | -1.13                                   |       |
|                                                             | $\text{AgO}_2^+ + \text{HO}_2$                               | -0.38                                   |       |
|                                                             | $\text{Ag}^+ + \text{O}_2 + \text{HO}_2$                     | -0.10                                   |       |
|                                                             | $\text{AgO}_4^+ + \text{H}$                                  | 1.85                                    |       |
|                                                             | $\text{AgO}_2\text{H} + \text{O}_2^+$                        | 3.26                                    |       |
|                                                             | $\text{AgO}_2 + \text{HO}_2^+$                               | 3.87                                    |       |
|                                                             | $\text{Ag} + \text{O}_2 + \text{HO}_2^+$                     | 3.88                                    |       |
|                                                             | $\text{Ag} + \text{O}_2^+ + \text{HO}_2$                     | 4.52                                    |       |
| $\text{AgO}_4\text{H}_2^+$                                  | $\text{AgOH}_2^+ + \text{O}_3$                               | 0.76                                    |       |
|                                                             | $\text{AgO}_3^+ + \text{H}_2\text{O}$                        | 1.18                                    |       |
|                                                             | $\text{Ag}^+ + \text{O}_3 + \text{H}_2\text{O}$              | 1.97                                    |       |
|                                                             | $\text{AgO}_2^+ + \text{H}_2\text{O} + \text{O}$             | 2.48                                    |       |
|                                                             | $\text{AgO}^+ + \text{H}_2\text{O} + \text{O}_2$             | 2.72                                    |       |
|                                                             | $\text{AgO} + \text{H}_2\text{O} + \text{O}_2^+$             | 6.53                                    |       |
|                                                             | $\text{AgO} + \text{H}_2\text{O}^+ + \text{O}_2$             | 7.10                                    |       |
|                                                             | $\text{AgOH}_2 + \text{O}_3^+$                               | 7.16                                    |       |
|                                                             | $\text{Ag} + \text{H}_2\text{O}^+ + \text{O}_3$              | 7.17                                    |       |
|                                                             | $\text{Ag} + \text{H}_2\text{O} + \text{O}_3^+$              | 7.23                                    |       |
|                                                             | $\text{AgO}_2 + \text{H}_2\text{O}^+ + \text{O}$             | 7.95                                    |       |
|                                                             | $\text{AgO}_2 + \text{H}_2\text{O} + \text{O}^+$             | 8.88                                    |       |
|                                                             | $\text{AgO}_4\text{H}_3^+$                                   | $\text{AgO}_2\text{H}_3^+ + \text{O}_2$ | -0.34 |
|                                                             |                                                              | $\text{AgO}_3\text{H}_2^+ + \text{OH}$  | 0.23  |
| $\text{AgOH}_2^+ + \text{OH} + \text{O}_2$                  |                                                              | 0.50                                    |       |
| $\text{AgOH}^+ + \text{H}_2\text{O} + \text{O}_2$           |                                                              | 0.85                                    |       |
| $\text{AgO}_2^+ + \text{OH} + \text{H}_2\text{O}$           |                                                              | 1.42                                    |       |
| $\text{Ag}^+ + \text{OH} + \text{O}_2 + \text{H}_2\text{O}$ |                                                              | 1.70                                    |       |
| $\text{AgO}_2\text{H}_3 + \text{O}_2^+$                     |                                                              | 3.26                                    |       |
| $\text{AgOH} + \text{O}_2^+ + \text{H}_2\text{O}$           |                                                              | 3.95                                    |       |
| $\text{AgOH} + \text{O}_2 + \text{H}_2\text{O}^+$           |                                                              | 4.52                                    |       |
| $\text{AgOH}_2 + \text{OH} + \text{O}_2^+$                  |                                                              | 6.26                                    |       |
| $\text{Ag} + \text{OH} + \text{O}_2^+ + \text{H}_2\text{O}$ |                                                              | 6.33                                    |       |
| $\text{AgO}_3\text{H}_2 + \text{OH}^+$                      |                                                              | 6.87                                    |       |
| $\text{AgO}_2 + \text{OH} + \text{H}_2\text{O}$             |                                                              | 6.90                                    |       |
| $\text{Ag} + \text{OH} + \text{O}_2 + \text{H}_2\text{O}^+$ |                                                              | 6.91                                    |       |
| $\text{AgOH}_2 + \text{OH}^+ + \text{O}_2$                  |                                                              | 7.21                                    |       |
| $\text{AgO}_2 + \text{OH}^+ + \text{H}_2\text{O}$           |                                                              | 7.27                                    |       |
| $\text{Ag} + \text{OH}^+ + \text{O}_2 + \text{H}_2\text{O}$ |                                                              | 7.28                                    |       |
| $\text{AgO}_4\text{H}_4^+$                                  |                                                              | $\text{AgO}_2\text{H}_4^+ + \text{O}_2$ | 0.08  |
|                                                             | $\text{AgO}_3\text{H}_2^+ + \text{H}_2\text{O}$              | 0.95                                    |       |
|                                                             | $\text{AgOH}_2^+ + \text{O}_2 + \text{H}_2\text{O}$          | 1.22                                    |       |
|                                                             | $\text{AgO}_2^+ + 2\text{H}_2\text{O}$                       | 2.14                                    |       |
|                                                             | $\text{Ag}^+ + \text{O}_2 + 2\text{H}_2\text{O}$             | 2.42                                    |       |
|                                                             | $\text{AgO}_2\text{H}_3^+ + \text{H} + \text{O}_2$           | 5.39                                    |       |
|                                                             | $\text{AgO}_4\text{H}_3^+ + \text{H}$                        | 5.73                                    |       |
|                                                             | $\text{AgOH}^+ + \text{O}_2 + \text{H}_2\text{O} + \text{H}$ | 6.57                                    |       |
|                                                             | $\text{AgO}_2\text{H}_4 + \text{O}_2^+$                      | 6.67                                    |       |
|                                                             | $\text{AgOH}_2 + \text{O}_2^+ + \text{H}_2\text{O}$          | 6.99                                    |       |
|                                                             | $\text{Ag} + \text{O}_2^+ + 2\text{H}_2\text{O}$             | 7.06                                    |       |
|                                                             | $\text{AgO}_3\text{H}_2 + \text{H}_2\text{O}^+$              | 7.22                                    |       |

|  |                                                                      |       |
|--|----------------------------------------------------------------------|-------|
|  | $\text{AgOH}_2 + \text{O}_2 + \text{H}_2\text{O}^+$                  | 7.56  |
|  | $\text{AgO}_2 + \text{H}_2\text{O} + \text{H}_2\text{O}^+$           | 7.62  |
|  | $\text{Ag} + \text{O}_2 + \text{H}_2\text{O} + \text{H}_2\text{O}^+$ | 7.63  |
|  | $\text{AgO}_2\text{H}_3 + \text{H} + \text{O}_2^+$                   | 8.99  |
|  | $\text{AgOH} + \text{H} + \text{O}_2^+ + \text{H}_2\text{O}$         | 9.67  |
|  | $\text{AgOH} + \text{H} + \text{O}_2 + \text{H}_2\text{O}^+$         | 10.24 |
|  | $\text{AgO}^+ + \text{O}_2 + \text{H}_2\text{O} + 2\text{H}$         | 11.70 |
|  | $\text{AgO} + 2\text{H} + \text{O}_2^+ + \text{H}_2\text{O}$         | 15.50 |
|  | $\text{AgO} + 2\text{H} + \text{O}_2 + \text{H}_2\text{O}^+$         | 16.08 |

e.  $\text{AgOH}_m^-$ :

| Species           | DC                                                       | $\Delta E$ (eV) |
|-------------------|----------------------------------------------------------|-----------------|
| $\text{AgOH}^-$   | $\text{Ag} + \text{OH}^-$                                | 1.68            |
|                   | $\text{Ag}^- + \text{OH}$                                | 2.43            |
|                   | $\text{AgO}^- + \text{H}$                                | 4.39            |
|                   | $\text{AgO} + \text{H}^-$                                | 6.13            |
| $\text{AgOH}_2^-$ | $\text{AgH} + \text{OH}^-$                               | 2.70            |
|                   | $\text{AgOH}^- + \text{H}$                               | 3.32            |
|                   | $\text{AgOH} + \text{H}^-$                               | 3.62            |
|                   | $\text{AgH}^- + \text{OH}$                               | 4.01            |
|                   | $\text{Ag} + \text{H} + \text{OH}^-$                     | 5.01            |
|                   | $\text{Ag}^- + \text{H} + \text{OH}$                     | 5.75            |
|                   | $\text{Ag} + \text{H}^- + \text{OH}$                     | 5.75            |
|                   | $\text{Ag} + \text{H} + \text{OH}^-$                     | 5.75            |
| $\text{AgOH}_3^-$ | $\text{AgH}^- + \text{H}_2\text{O}$                      | 0.40            |
|                   | $\text{AgH} + \text{H}_2\text{O}^-$                      | 1.41            |
|                   | $\text{Ag}^- + \text{H} + \text{H}_2\text{O}$            | 2.15            |
|                   | $\text{AgOH}_2 + \text{H}^-$                             | 2.33            |
|                   | $\text{Ag} + \text{H}^- + \text{H}_2\text{O}$            | 2.40            |
|                   | $\text{Ag} + \text{H} + \text{H}_2\text{O}^-$            | 3.71            |
|                   | $\text{Ag} + \text{H} + \text{H}_2\text{O}^-$            | 3.71            |
| $\text{AgOH}_4^-$ | $\text{AgH}_2^- + \text{H}_2\text{O}$                    | 0.47            |
|                   | $\text{AgH}_2 + \text{H}_2\text{O}^-$                    | 2.55            |
|                   | $\text{AgOH}_3 + \text{H}^-$                             | 2.83            |
|                   | $\text{AgOH}_3^- + \text{H}$                             | 3.28            |
|                   | $\text{Ag}^- + 2\text{H} + \text{H}_2\text{O}$           | 5.42            |
|                   | $\text{Ag} + \text{H} + \text{H}^- + \text{H}_2\text{O}$ | 5.68            |
|                   | $\text{Ag} + 2\text{H} + \text{H}_2\text{O}^-$           | 6.99            |
|                   | $\text{Ag} + 2\text{H} + \text{H}_2\text{O}^-$           | 6.99            |

f.  $\text{AgO}_2\text{H}_m^-$ :

| Species                    | DC                                    | $\Delta E$ (eV) |
|----------------------------|---------------------------------------|-----------------|
| $\text{AgO}_2\text{H}^-$   | $\text{AgOH} + \text{O}^-$            | 2.58            |
|                            | $\text{AgOH}^- + \text{O}$            | 2.88            |
|                            | $\text{AgO}^- + \text{OH}$            | 2.97            |
|                            | $\text{AgO} + \text{OH}^-$            | 3.70            |
|                            | $\text{AgO}_2^- + \text{H}$           | 3.73            |
|                            | $\text{Ag} + \text{O} + \text{OH}^-$  | 4.56            |
|                            | $\text{Ag} + \text{O}^- + \text{OH}$  | 4.96            |
|                            | $\text{AgO}_2 + \text{H}^-$           | 4.99            |
|                            | $\text{Ag}^- + \text{O} + \text{OH}$  | 5.31            |
|                            | $\text{Ag}^- + \text{O} + \text{OH}$  | 5.31            |
|                            | $\text{Ag}^- + \text{O} + \text{OH}$  | 5.31            |
| $\text{AgO}_2\text{H}_2^-$ | $\text{AgOH} + \text{OH}^-$           | 3.12            |
|                            | $\text{AgOH}^- + \text{OH}$           | 3.82            |
|                            | $\text{AgO}_2\text{H}^- + \text{H}$   | 5.25            |
|                            | $\text{Ag} + \text{OH}^- + \text{OH}$ | 5.51            |
|                            | $\text{Ag}^- + 2\text{OH}$            | 6.26            |
|                            | $\text{AgO}_2^- + 2\text{H}$          | 8.99            |
|                            | $\text{AgO}_2^- + 2\text{H}$          | 8.99            |

|                                                           |                                                |                                        |      |
|-----------------------------------------------------------|------------------------------------------------|----------------------------------------|------|
|                                                           | $\text{AgO}_2 + \text{H} + \text{H}^-$         | 10.25                                  |      |
| $\text{AgO}_2\text{H}_3^-$                                | $\text{AgOH}^- + \text{H}_2\text{O}$           | 0.73                                   |      |
|                                                           | $\text{AgOH} + \text{H}_2\text{O}^-$           | 2.34                                   |      |
|                                                           | $\text{Ag} + \text{OH}^- + \text{H}_2\text{O}$ | 2.41                                   |      |
|                                                           | $\text{Ag}^- + \text{OH} + \text{H}_2\text{O}$ | 3.16                                   |      |
|                                                           | $\text{Ag} + \text{OH} + \text{H}_2\text{O}^-$ | 4.73                                   |      |
|                                                           | $\text{AgO}^- + \text{H} + \text{H}_2\text{O}$ | 5.12                                   |      |
|                                                           | $\text{AgO} + \text{H}^- + \text{H}_2\text{O}$ | 6.86                                   |      |
|                                                           | $\text{AgO} + \text{H} + \text{H}_2\text{O}^-$ | 8.17                                   |      |
|                                                           | $\text{AgO}_2\text{H}_4^-$                     | $\text{AgOH}_2^- + \text{H}_2\text{O}$ | 0.70 |
|                                                           |                                                | $\text{AgOH}_3 + \text{OH}^-$          | 2.85 |
| $\text{AgO}_2\text{H}_3^- + \text{H}$                     |                                                | 3.29                                   |      |
| $\text{AgO}_2\text{H}_3 + \text{H}^-$                     |                                                | 3.63                                   |      |
| $\text{AgOH}^- + \text{H} + \text{H}_2\text{O}$           |                                                | 4.01                                   |      |
| $\text{AgOH}_3^- + \text{OH}$                             |                                                | 4.30                                   |      |
| $\text{AgOH} + \text{H}^- + \text{H}_2\text{O}$           |                                                | 4.32                                   |      |
| $\text{AgOH} + \text{H} + \text{H}_2\text{O}^-$           |                                                | 5.62                                   |      |
| $\text{Ag} + \text{H} + \text{OH}^- + \text{H}_2\text{O}$ |                                                | 5.70                                   |      |
| $\text{Ag}^- + \text{H} + \text{OH} + \text{H}_2\text{O}$ |                                                | 6.45                                   |      |
| $\text{Ag} + \text{H}^- + \text{OH} + \text{H}_2\text{O}$ |                                                | 6.70                                   |      |
| $\text{Ag} + \text{H} + \text{OH} + \text{H}_2\text{O}^-$ |                                                | 8.01                                   |      |

g.  $\text{AgO}_3\text{H}_m^-$ :

| Species                                 | DC                                     | $\Delta E$ (eV)                      |      |
|-----------------------------------------|----------------------------------------|--------------------------------------|------|
| $\text{AgO}_3\text{H}^-$                | $\text{AgOH}^- + \text{O}_2$           | 1.55                                 |      |
|                                         | $\text{AgOH} + \text{O}_2^-$           | 2.19                                 |      |
|                                         | $\text{AgO}_2 + \text{OH}^-$           | 3.23                                 |      |
|                                         | $\text{Ag} + \text{OH}^- + \text{O}_2$ | 3.23                                 |      |
|                                         | $\text{AgO}_2\text{H}^- + \text{O}$    | 3.55                                 |      |
|                                         | $\text{Ag}^- + \text{OH} + \text{O}_2$ | 3.98                                 |      |
|                                         | $\text{Ag} + \text{OH} + \text{O}_2^-$ | 4.58                                 |      |
|                                         | $\text{AgO}_2\text{H} + \text{O}^-$    | 4.62                                 |      |
|                                         | $\text{AgO}_3^- + \text{H}$            | 4.63                                 |      |
|                                         | $\text{AgO}^- + \text{H} + \text{O}_2$ | 5.94                                 |      |
|                                         | $\text{AgO}_3 + \text{H}^-$            | 6.47                                 |      |
|                                         | $\text{AgO}_2^- + \text{H} + \text{O}$ | 7.28                                 |      |
|                                         | $\text{AgO} + \text{H}^- + \text{O}_2$ | 7.68                                 |      |
|                                         | $\text{AgO}_2 + \text{H} + \text{O}^-$ | 7.93                                 |      |
|                                         | $\text{AgO} + \text{H} + \text{O}_2^-$ | 8.02                                 |      |
|                                         | $\text{AgO}_2 + \text{H}^- + \text{O}$ | 8.54                                 |      |
|                                         | $\text{AgO}_3\text{H}_2^-$             | $\text{AgO}_2\text{H}^- + \text{OH}$ | 2.58 |
|                                         |                                        | $\text{AgOH} + \text{HO}_2^-$        | 2.82 |
| $\text{AgOH}^- + \text{HO}_2$           |                                        | 2.83                                 |      |
| $\text{AgO}_2\text{H} + \text{OH}^-$    |                                        | 3.25                                 |      |
| $\text{AgO}_3\text{H}^- + \text{H}$     |                                        | 3.33                                 |      |
| $\text{Ag} + \text{OH}^- + \text{HO}_2$ |                                        | 4.51                                 |      |
| $\text{AgO}_3\text{H} + \text{H}^-$     |                                        | 5.01                                 |      |
| $\text{Ag} + \text{OH} + \text{HO}_2^-$ |                                        | 5.21                                 |      |
| $\text{Ag}^- + \text{OH} + \text{HO}_2$ |                                        | 5.26                                 |      |
| $\text{AgO}^- + 2\text{OH}$             |                                        | 5.54                                 |      |
| $\text{AgO} + \text{OH} + \text{OH}^-$  |                                        | 6.28                                 |      |
| $\text{AgO}_2^- + \text{H} + \text{OH}$ |                                        | 6.31                                 |      |
| $\text{AgO}_2 + \text{H} + \text{OH}^-$ |                                        | 6.56                                 |      |
| $\text{AgO}^- + \text{H} + \text{HO}_2$ |                                        | 7.22                                 |      |
| $\text{AgO}_2 + \text{H}^- + \text{OH}$ |                                        | 7.57                                 |      |

|                                                            |                                                    |                                                  |      |
|------------------------------------------------------------|----------------------------------------------------|--------------------------------------------------|------|
|                                                            | $\text{AgO}_3^- + 2\text{H}$                       | 7.97                                             |      |
|                                                            | $\text{AgO} + \text{H} + \text{HO}_2^-$            | 8.65                                             |      |
|                                                            | $\text{AgO} + \text{H}^- + \text{HO}_2$            | 8.96                                             |      |
|                                                            | $\text{AgO}_3 + \text{H} + \text{H}^-$             | 9.81                                             |      |
| $\text{AgO}_3\text{H}_3^-$                                 | $\text{AgO}_2\text{H}_2^- + \text{OH}$             | 0.92                                             |      |
|                                                            | $\text{AgO}_2\text{H}_2 + \text{OH}^-$             | 3.03                                             |      |
|                                                            | $\text{AgOH} + \text{OH} + \text{OH}^-$            | 4.04                                             |      |
|                                                            | $\text{AgOH}^- + 2\text{OH}$                       | 4.74                                             |      |
|                                                            | $\text{AgO}_2\text{H}^- + \text{H} + \text{OH}$    | 6.17                                             |      |
|                                                            | $\text{Ag} + 2\text{OH} + \text{OH}^-$             | 6.42                                             |      |
|                                                            | $\text{AgO}_2\text{H} + \text{H} + \text{OH}^-$    | 6.84                                             |      |
|                                                            | $\text{Ag}^- + 3\text{OH}$                         | 7.18                                             |      |
|                                                            | $\text{AgO}_2\text{H} + \text{H}^- + \text{OH}$    | 7.85                                             |      |
|                                                            | $\text{AgO}_3\text{H} + \text{H} + \text{H}^-$     | 8.61                                             |      |
|                                                            | $\text{AgO}^- + \text{H} + 2\text{OH}$             | 9.14                                             |      |
|                                                            | $\text{AgO} + \text{H} + \text{OH} + \text{OH}^-$  | 9.87                                             |      |
|                                                            | $\text{AgO}_2^- + 2\text{H} + \text{OH}$           | 9.90                                             |      |
|                                                            | $\text{AgO}_2 + 2\text{H} + \text{OH}^-$           | 10.16                                            |      |
|                                                            | $\text{AgO} + \text{H}^- + 2\text{OH}$             | 10.88                                            |      |
|                                                            | $\text{AgO}_2 + \text{H} + \text{H}^- + \text{OH}$ | 11.16                                            |      |
|                                                            | $\text{AgO}_3^- + 3\text{H}$                       | 11.56                                            |      |
|                                                            | $\text{AgO}_3 + 2\text{H} + \text{H}^-$            | 13.41                                            |      |
|                                                            | $\text{AgO}_3\text{H}_4^-$                         | $\text{AgO}_2\text{H}_2^- + \text{H}_2\text{O}$  | 0.66 |
|                                                            |                                                    | $\text{AgO}_2\text{H}_3 + \text{OH}^-$           | 3.10 |
|                                                            |                                                    | $\text{AgO}_2\text{H}_3^- + \text{OH}$           | 3.76 |
|                                                            |                                                    | $\text{AgOH} + \text{OH}^- + \text{H}_2\text{O}$ | 3.79 |
|                                                            |                                                    | $\text{AgOH}^- + \text{OH} + \text{H}_2\text{O}$ | 4.49 |
| $\text{AgO}_2\text{H}_2 + \text{H}_2\text{O}^-$            |                                                    | 5.10                                             |      |
| $\text{AgO}_2\text{H}^- + \text{H} + \text{H}_2\text{O}$   |                                                    | 5.92                                             |      |
| $\text{AgOH} + \text{OH} + \text{H}_2\text{O}^-$           |                                                    | 6.10                                             |      |
| $\text{Ag} + \text{OH} + \text{OH}^- + \text{H}_2\text{O}$ |                                                    | 6.18                                             |      |
| $\text{AgO} + \text{H} + \text{OH}^- + \text{H}_2\text{O}$ |                                                    | 6.62                                             |      |
| $\text{Ag}^- + 2\text{OH} + \text{H}_2\text{O}$            |                                                    | 6.93                                             |      |
| $\text{AgO}_2\text{H} + \text{H}^- + \text{H}_2\text{O}$   |                                                    | 7.60                                             |      |
| $\text{Ag} + 2\text{OH} + \text{H}_2\text{O}^-$            |                                                    | 8.49                                             |      |
| $\text{AgO}^- + \text{H} + \text{OH} + \text{H}_2\text{O}$ |                                                    | 8.89                                             |      |
| $\text{AgO} + \text{H}^- + \text{OH} + \text{H}_2\text{O}$ |                                                    | 10.63                                            |      |
| $\text{AgO} + \text{H} + \text{OH} + \text{H}_2\text{O}^-$ |                                                    | 11.93                                            |      |

h.  $\text{AgO}_4\text{H}_m^-$ :

| Species                  | DC                                     | $\Delta E$ (eV)                         |
|--------------------------|----------------------------------------|-----------------------------------------|
| $\text{AgO}_4\text{H}^-$ | $\text{AgO}_2\text{H}^- + \text{O}_2$  | 1.35                                    |
|                          | $\text{AgOH} + \text{O}_3^-$           | 2.32                                    |
|                          | $\text{AgO}_3\text{H}^- + \text{O}$    | 2.68                                    |
|                          | $\text{AgO}_2\text{H} + \text{O}_2^-$  | 3.36                                    |
|                          | $\text{AgOH}^- + \text{O}_3$           | 3.44                                    |
|                          | $\text{AgO}_3\text{H} + \text{O}^-$    | 3.75                                    |
|                          | $\text{Ag} + \text{OH} + \text{O}_3^-$ | 4.70                                    |
|                          | $\text{Ag} + \text{OH}^- + \text{O}_3$ | 5.12                                    |
|                          | $\text{Ag}^- + \text{OH} + \text{O}_3$ | 5.87                                    |
|                          | $\text{AgO}^- + \text{H} + \text{O}_3$ | 7.83                                    |
|                          | $\text{AgO} + \text{H} + \text{O}_3^-$ | 8.15                                    |
|                          | $\text{AgO} + \text{H}^- + \text{O}_3$ | 9.57                                    |
|                          | $\text{AgO}_4\text{H}_2^-$             | $\text{AgO}_2\text{H}_2^- + \text{O}_2$ |

|                            |                                                             |       |
|----------------------------|-------------------------------------------------------------|-------|
|                            | $\text{AgO}_3\text{H}^- + \text{OH}$                        | 2.32  |
|                            | $\text{AgO}_3\text{H} + \text{OH}^-$                        | 2.99  |
|                            | $\text{AgOH} + \text{OH}^- + \text{O}_2$                    | 3.16  |
|                            | $\text{AgO}_2\text{H}_2 + \text{O}_2^-$                     | 3.50  |
|                            | $\text{AgOH}^- + \text{OH} + \text{O}_2$                    | 3.86  |
|                            | $\text{AgOH} + \text{OH} + \text{O}_2^-$                    | 4.51  |
|                            | $\text{Ag} + \text{OH} + \text{OH}^- + \text{O}_2$          | 5.55  |
|                            | $\text{Ag}^- + 2\text{OH} + \text{O}_2$                     | 6.30  |
|                            | $\text{Ag} + 2\text{OH} + \text{O}_2^-$                     | 6.89  |
|                            | $\text{AgO}^- + \text{H} + \text{OH} + \text{O}_2$          | 8.26  |
|                            | $\text{AgO} + \text{H} + \text{OH}^- + \text{O}_2$          | 8.99  |
|                            | $\text{AgO} + \text{H}^- + \text{OH} + \text{O}_2$          | 10.00 |
|                            | $\text{AgO} + \text{H} + \text{OH} + \text{O}_2^-$          | 10.34 |
| $\text{AgO}_4\text{H}_3^-$ | $\text{AgO}_3\text{H}^- + \text{H}_2\text{O}$               | 0.40  |
|                            | $\text{AgOH}^- + \text{O}_2 + \text{H}_2\text{O}$           | 1.95  |
|                            | $\text{AgOH} + \text{O}_2^- + \text{H}_2\text{O}$           | 2.59  |
|                            | $\text{AgO}_3\text{H} + \text{H}_2\text{O}^-$               | 3.39  |
|                            | $\text{AgOH} + \text{O}_2 + \text{H}_2\text{O}$             | 3.56  |
|                            | $\text{Ag} + \text{OH}^- + \text{O}_2 + \text{H}_2\text{O}$ | 3.64  |
|                            | $\text{AgO}_2\text{H}^- + \text{O} + \text{H}_2\text{O}$    | 3.95  |
|                            | $\text{Ag}^- + \text{OH} + \text{O}_2 + \text{H}_2\text{O}$ | 4.39  |
|                            | $\text{Ag} + \text{OH} + \text{O}_2^- + \text{H}_2\text{O}$ | 4.98  |
|                            | $\text{AgO}_2\text{H} + \text{O}^- + \text{H}_2\text{O}$    | 5.02  |
|                            | $\text{Ag} + \text{OH} + \text{O}_2 + \text{H}_2\text{O}^-$ | 5.95  |
|                            | $\text{AgO}^- + \text{H} + \text{O}_2 + \text{H}_2\text{O}$ | 6.35  |
|                            | $\text{AgO}^- + \text{O} + \text{OH} + \text{H}_2\text{O}$  | 6.91  |
|                            | $\text{AgO}_2\text{H} + \text{O} + \text{H}_2\text{O}^-$    | 6.93  |
|                            | $\text{AgO} + \text{O} + \text{OH}^- + \text{H}_2\text{O}$  | 7.65  |
|                            | $\text{AgO} + \text{O}^- + \text{OH} + \text{H}_2\text{O}$  | 8.05  |
|                            | $\text{AgO} + \text{H}^- + \text{O}_2 + \text{H}_2\text{O}$ | 8.08  |
|                            | $\text{AgO} + \text{H} + \text{O}_2^- + \text{H}_2\text{O}$ | 8.42  |
|                            | $\text{AgO} + \text{H} + \text{O}_2 + \text{H}_2\text{O}^-$ | 9.39  |
|                            | $\text{AgO} + \text{O} + \text{OH} + \text{H}_2\text{O}$    | 9.96  |
| $\text{AgO}_4\text{H}_4^-$ | $\text{AgO}_3\text{H}_3^- + \text{OH}$                      | 2.45  |
|                            | $\text{AgO}_2\text{H}_2^- + 2\text{OH}$                     | 3.37  |
|                            | $\text{AgO}_3\text{H}_3 + \text{OH}^-$                      | 3.70  |
|                            | $\text{AgO}_2\text{H}_2 + \text{OH} + \text{OH}^-$          | 5.49  |
|                            | $\text{AgOH} + 2\text{OH} + \text{OH}^-$                    | 6.49  |
|                            | $\text{AgOH}^- + 3\text{OH}$                                | 7.20  |
|                            | $\text{Ag} + 3\text{OH} + \text{OH}^-$                      | 8.88  |
|                            | $\text{Ag}^- + 4\text{OH}$                                  | 9.63  |
|                            | $\text{AgO}^- + \text{H} + 3\text{OH}$                      | 11.59 |
|                            | $\text{AgO} + \text{H} + 2\text{OH} + \text{OH}^-$          | 12.32 |
|                            | $\text{AgO}_2^- + 2\text{H} + 2\text{OH}$                   | 12.35 |
|                            | $\text{AgO}_2 + 2\text{H} + \text{OH} + \text{OH}^-$        | 12.61 |
|                            | $\text{AgO} + \text{H}^- + 3\text{OH}$                      | 13.33 |
|                            | $\text{AgO}_2 + \text{H}^- + \text{H} + 2\text{OH}$         | 13.61 |
|                            | $\text{AgO}_3^- + 3\text{H} + \text{OH}$                    | 14.01 |
|                            | $\text{AgO}_4^- + 4\text{H}$                                | 14.92 |

**Table S3**

The values of electronic energy (EE; Hartree); energy of HOMO ( $\epsilon_{\text{HOMO}}$ ; eV); energy of LUMO ( $\epsilon_{\text{LUMO}}$ ; eV); the HOMO-LUMO energy gap (HLG; eV); chemical hardness ( $\eta$ ; eV); chemical potential ( $\mu$ ; eV); electrophilicity index ( $\omega$ ; eV) of the  $\text{AgO}_k\text{H}_m^\pm$  clusters, where  $k, m = 1 - 4$ , obtained at the  $\omega\text{B97XD}$  calculations. Note that only EE values are reported for the open-shell systems.

| Systems                                         | EE          | $\epsilon_{\text{HOMO}}$ | $\epsilon_{\text{LUMO}}$ | HLG       | $\eta$   | $\mu$      | $\omega$  |
|-------------------------------------------------|-------------|--------------------------|--------------------------|-----------|----------|------------|-----------|
| <b>AgOH<sup>+</sup></b>                         | -222.454675 |                          |                          |           |          |            |           |
| <b>AgOH<sub>2</sub><sup>+</sup></b>             | -223.167256 | -17.057191               | -6.515769                | 10.541422 | 5.270711 | -11.786480 | 13.178593 |
| <b>AgOH<sub>3</sub><sup>+</sup></b>             | -223.699083 |                          |                          |           |          |            |           |
| <b>AgOH<sub>4</sub><sup>+</sup></b>             | -224.364072 | -16.569563               | -5.279827                | 11.289736 | 5.644868 | -10.924695 | 10.571457 |
| <b>AgO<sub>2</sub>H<sup>+</sup></b>             | -297.640595 |                          |                          |           |          |            |           |
| <b>AgO<sub>2</sub>H<sub>2</sub><sup>+</sup></b> | -298.286436 | -16.238400               | -6.523660                | 9.714740  | 4.857370 | -11.381030 | 13.333125 |
| <b>AgO<sub>2</sub>H<sub>3</sub><sup>+</sup></b> | -298.944186 |                          |                          |           |          |            |           |
| <b>AgO<sub>2</sub>H<sub>4</sub><sup>+</sup></b> | -299.653947 | -15.506414               | -4.709476                | 10.796938 | 5.398469 | -10.107945 | 9.462919  |
| <b>AgO<sub>3</sub>H<sup>+</sup></b>             | -372.796833 |                          |                          |           |          |            |           |
| <b>AgO<sub>3</sub>H<sub>2</sub><sup>+</sup></b> | -373.512219 |                          |                          |           |          |            |           |
| <b>AgO<sub>3</sub>H<sub>3</sub><sup>+</sup></b> | -374.127709 |                          |                          |           |          |            |           |
| <b>AgO<sub>3</sub>H<sub>4</sub><sup>+</sup></b> | -374.773231 | -15.229402               | -4.775056                | 10.454346 | 5.227173 | -10.002229 | 9.569665  |
| <b>AgO<sub>4</sub>H<sup>+</sup></b>             | -447.985657 |                          |                          |           |          |            |           |
| <b>AgO<sub>4</sub>H<sub>2</sub><sup>+</sup></b> | -448.621258 | -16.014723               | -8.467370                | 7.547353  | 3.773676 | -12.241046 | 19.853745 |
| <b>AgO<sub>4</sub>H<sub>3</sub><sup>+</sup></b> | -449.192647 |                          |                          |           |          |            |           |
| <b>AgO<sub>4</sub>H<sub>4</sub><sup>+</sup></b> | -449.990535 |                          |                          |           |          |            |           |
| <b>AgOH<sup>-</sup></b>                         | -222.822651 |                          |                          |           |          |            |           |
| <b>AgOH<sub>2</sub><sup>-</sup></b>             | -223.457333 | -3.291490                | 4.089329                 | 7.380819  | 3.690410 | 0.398920   | 0.021561  |
| <b>AgOH<sub>3</sub><sup>-</sup></b>             | -224.018024 |                          |                          |           |          |            |           |
| <b>AgOH<sub>4</sub><sup>-</sup></b>             | -224.654394 | -3.556802                | 3.852317                 | 7.409119  | 3.704560 | 0.147758   | 0.002947  |
| <b>AgO<sub>2</sub>H<sup>-</sup></b>             | -298.029123 |                          |                          |           |          |            |           |
| <b>AgO<sub>2</sub>H<sub>2</sub><sup>-</sup></b> | -298.709174 | -3.569047                | 3.895583                 | 7.464630  | 3.732315 | 0.163268   | 0.003571  |
| <b>AgO<sub>2</sub>H<sub>3</sub><sup>-</sup></b> | -299.292106 |                          |                          |           |          |            |           |
| <b>AgO<sub>2</sub>H<sub>4</sub><sup>-</sup></b> | -299.926084 | -3.745649                | 3.795990                 | 7.541639  | 3.770819 | 0.025171   | 0.000084  |
| <b>AgO<sub>3</sub>H<sup>-</sup></b>             | -373.220980 |                          |                          |           |          |            |           |
| <b>AgO<sub>3</sub>H<sub>2</sub><sup>-</sup></b> | -373.843461 | -3.350811                | 3.756805                 | 7.107616  | 3.553808 | 0.202997   | 0.005798  |
| <b>AgO<sub>3</sub>H<sub>3</sub><sup>-</sup></b> | -374.492472 |                          |                          |           |          |            |           |
| <b>AgO<sub>3</sub>H<sub>4</sub><sup>-</sup></b> | -375.176759 | -4.116268                | 3.600340                 | 7.716608  | 3.858304 | -0.257964  | 0.008624  |
| <b>AgO<sub>4</sub>H<sup>-</sup></b>             | -448.386446 |                          |                          |           |          |            |           |
| <b>AgO<sub>4</sub>H<sub>2</sub><sup>-</sup></b> | -449.044976 |                          |                          |           |          |            |           |
| <b>AgO<sub>4</sub>H<sub>3</sub><sup>-</sup></b> | -449.684175 |                          |                          |           |          |            |           |
| <b>AgO<sub>4</sub>H<sub>4</sub><sup>-</sup></b> | -450.324761 | -4.887983                | 3.193529                 | 8.081512  | 4.040756 | -0.847227  | 0.088819  |

**Table S4**

Natural electronic configuration and natural charges of the  $\text{AgO}_k\text{H}_m^\pm$  clusters, where  $k, m = 1 - 4$ , obtained from NBO calculations at the  $\omega\text{B97XD}$  level of theory.

| Systems                                         | atom | Natural Charge | Electron Configuration                         |
|-------------------------------------------------|------|----------------|------------------------------------------------|
| <b>AgOH<sup>+</sup></b>                         | Ag   | 0.97585        | [core]5s(0.04)4d(9.97)5p(0.01)                 |
|                                                 | H    | 0.46571        | 1s(0.53)                                       |
|                                                 | O    | -0.44156       | [core]2s(1.88)2p(4.55)3d(0.01)                 |
| <b>AgOH<sub>2</sub><sup>+</sup></b>             | Ag   | 0.97511        | [core]5s(0.04)4d(9.98)5p(0.01)                 |
|                                                 | H    | 0.52045        | 1s(0.48)                                       |
|                                                 | H    | 0.52045        | 1s(0.48)                                       |
|                                                 | O    | -1.01602       | [core]2s(1.74)2p(5.27)                         |
| <b>AgOH<sub>3</sub><sup>+</sup></b>             | Ag   | 0.91632        | [core]5s(0.29)4d(9.75)5p(0.05)                 |
|                                                 | H    | 0.52694        | 1s(0.47)                                       |
|                                                 | H    | 0.52693        | 1s(0.47)                                       |
|                                                 | H    | 0.02939        | 1s(0.97)                                       |
|                                                 | O    | -0.99958       | [core]2s(1.73)2p(5.26)3p(0.01)                 |
| <b>AgOH<sub>4</sub><sup>+</sup></b>             | Ag   | 0.90012        | [core]5s(0.15)4d(9.93)5p(0.02)                 |
|                                                 | H    | 0.02102        | 1s(0.97)2p(0.01)                               |
|                                                 | H    | 0.52309        | 1s(0.47)                                       |
|                                                 | H    | 0.52308        | 1s(0.47)                                       |
|                                                 | H    | 0.02106        | 1s(0.97)2p(0.01)                               |
|                                                 | O    | -0.98837       | [core]2s(1.73)2p(5.25)                         |
| <b>AgO<sub>2</sub>H<sup>+</sup></b>             | Ag   | 0.95057        | [core]5s(0.06)4d(9.98)5p(0.01)                 |
|                                                 | H    | 0.49785        | 1s(0.50)                                       |
|                                                 | O    | -0.22909       | [core]2s(1.75)2p(4.46)3p(0.01)3d(0.01)         |
|                                                 | O    | -0.21933       | [core]2s(1.86)2p(4.33)3s(0.01)3p(0.01)3d(0.01) |
|                                                 |      |                |                                                |
| <b>AgO<sub>2</sub>H<sub>2</sub><sup>+</sup></b> | Ag   | 0.96289        | [core]5s(0.03)4d(9.99)5p(0.01)                 |
|                                                 | H    | 0.49907        | 1s(0.50)                                       |
|                                                 | H    | 0.49907        | 1s(0.50)                                       |
|                                                 | O    | -0.48047       | [core]2s(1.79)2p(4.68)3p(0.01)4d(0.01)         |
|                                                 | O    | -0.48057       | [core]2s(1.78)2p(4.68)3p(0.01)4d(0.01)         |
| <b>AgO<sub>2</sub>H<sub>3</sub><sup>+</sup></b> | Ag   | 0.90584        | [core]5s(0.17)4d(9.90)5p(0.02)                 |
|                                                 | H    | 0.52043        | 1s(0.48)                                       |
|                                                 | H    | 0.52015        | 1s(0.48)                                       |
|                                                 | H    | 0.46245        | 1s(0.53)                                       |
|                                                 | O    | -0.98835       | [core]2s(1.73)2p(5.25)3p(0.01)                 |
|                                                 | O    | -0.42052       | [core]2s(1.87)2p(4.54)3d(0.01)                 |
| <b>AgO<sub>2</sub>H<sub>4</sub><sup>+</sup></b> | Ag   | 0.896          | [core]5s(0.16)4d(9.92)5p(0.02)                 |
|                                                 | H    | 0.51809        | 1s(0.48)                                       |
|                                                 | H    | 0.51806        | 1s(0.48)                                       |
|                                                 | H    | 0.5181         | 1s(0.48)                                       |
|                                                 | H    | 0.51804        | 1s(0.48)                                       |
|                                                 | O    | -0.98414       | [core]2s(1.73)2p(5.25)3p(0.01)                 |

|                                                 |    |          |                                                |
|-------------------------------------------------|----|----------|------------------------------------------------|
|                                                 | O  | -0.98415 | [core]2s(1.73)2p(5.25)3p(0.01)                 |
| <b>AgO<sub>3</sub>H<sup>+</sup></b>             | Ag | 0.94152  | [core]5s(0.06)4d(9.98)5p(0.02)                 |
|                                                 | H  | 0.51625  | 1s(0.48)                                       |
|                                                 | O  | 0.18701  | [core]2s(1.75)2p(4.03)3s(0.01)3p(0.01)3d(0.01) |
|                                                 | O  | -0.51411 | [core]2s(1.80)2p(4.69)3p(0.01)3d(0.01)         |
|                                                 | O  | -0.13066 | [core]2s(1.83)2p(4.27)3s(0.01)3p(0.01)3d(0.01) |
| <b>AgO<sub>3</sub>H<sub>2</sub><sup>+</sup></b> | Ag | 0.92367  | [core]5s(0.10)4d(9.95)5p(0.02)                 |
|                                                 | H  | 0.52007  | 1s(0.48)                                       |
|                                                 | H  | 0.52007  | 1s(0.48)                                       |
|                                                 | O  | -0.10427 | [core]2s(1.80)2p(4.27)3s(0.02)3p(0.01)3d(0.01) |
|                                                 | O  | 0.14068  | [core]2s(1.81)2p(4.02)3s(0.01)3p(0.01)3d(0.01) |
|                                                 | O  | -1.00022 | [core]2s(1.73)2p(5.26)3p(0.01)                 |
| <b>AgO<sub>3</sub>H<sub>3</sub><sup>+</sup></b> | Ag | 0.87774  | [core]5s(0.17)4d(9.92)5p(0.02)                 |
|                                                 | H  | 0.51849  | 1s(0.48)                                       |
|                                                 | H  | 0.51849  | 1s(0.48)                                       |
|                                                 | H  | 0.49447  | 1s(0.50)                                       |
|                                                 | O  | -0.98723 | [core]2s(1.73)2p(5.25)3p(0.01)                 |
|                                                 | O  | -0.19018 | [core]2s(1.85)2p(4.31)3s(0.01)3p(0.01)3d(0.01) |
|                                                 | O  | -0.23178 | [core]2s(1.75)2p(4.46)3p(0.01)3d(0.01)         |
| <b>AgO<sub>3</sub>H<sub>4</sub><sup>+</sup></b> | Ag | 0.88631  | [core]5s(0.15)4d(9.93)5p(0.03)                 |
|                                                 | H  | 0.51756  | 1s(0.48)                                       |
|                                                 | H  | 0.48262  | 1s(0.51)                                       |
|                                                 | H  | 0.50465  | 1s(0.49)                                       |
|                                                 | H  | 0.51759  | 1s(0.48)                                       |
|                                                 | O  | -0.41605 | [core]2s(1.79)2p(4.61)3p(0.01)4d(0.01)         |
|                                                 | O  | -0.50609 | [core]2s(1.77)2p(4.72)3p(0.01)4d(0.01)         |
|                                                 | O  | -0.98659 | [core]2s(1.73)2p(5.25)3p(0.01)                 |
| <b>AgO<sub>4</sub>H<sup>+</sup></b>             | Ag | 0.89931  | [core]5s(0.12)4d(9.95)5p(0.03)                 |
|                                                 | H  | 0.49744  | 1s(0.50)                                       |
|                                                 | O  | -0.10606 | [core]2s(1.80)2p(4.27)3s(0.01)3p(0.01)3d(0.01) |
|                                                 | O  | 0.14224  | [core]2s(1.81)2p(4.02)3s(0.01)3p(0.01)3d(0.01) |
|                                                 | O  | -0.20361 | [core]2s(1.85)2p(4.32)3s(0.01)3p(0.01)3d(0.01) |
|                                                 | O  | -0.22933 | [core]2s(1.75)2p(4.46)3p(0.01)3d(0.01)         |
| <b>AgO<sub>4</sub>H<sub>2</sub><sup>+</sup></b> | Ag | 0.84868  | [core]5s(0.17)4d(9.94)5p(0.05)                 |
|                                                 | H  | 0.51875  | 1s(0.48)                                       |
|                                                 | H  | 0.51883  | 1s(0.48)                                       |
|                                                 | O  | -0.98804 | [core]2s(1.73)2p(5.25)3p(0.01)                 |
|                                                 | O  | 0.35444  | [core]2s(1.66)2p(3.94)3p(0.01)4s(0.01)3d(0.02) |
|                                                 | O  | -0.16853 | [core]2s(1.84)2p(4.30)3s(0.01)3p(0.01)         |
|                                                 | O  | -0.08412 | [core]2s(1.84)2p(4.23)3s(0.01)3p(0.01)         |
| <b>AgO<sub>4</sub>H<sub>3</sub><sup>+</sup></b> | Ag | 0.94676  | [core]5s(0.22)4d(9.78)5p(0.05)                 |
|                                                 | H  | 0.46656  | 1s(0.53)                                       |
|                                                 | H  | 0.52022  | 1s(0.48)                                       |
|                                                 | H  | 0.51946  | 1s(0.48)                                       |



|                                                 |    |          |                                                |
|-------------------------------------------------|----|----------|------------------------------------------------|
|                                                 | O  | -0.97704 | [core]2s(1.72)2p(5.24)3p(0.01)                 |
|                                                 | O  | 0.093    | [core]2s(1.81)2p(4.06)3s(0.01)3p(0.01)3d(0.01) |
|                                                 | O  | 0.16018  | [core]2s(1.82)2p(3.99)3s(0.01)3p(0.01)3d(0.01) |
|                                                 | O  | -0.72914 | [core]2s(1.86)2p(4.86)3d(0.01)                 |
| <b>AgO<sub>4</sub>H<sub>4</sub><sup>+</sup></b> | Ag | 0.87306  | [core]5s(0.16)4d(9.93)5p(0.04)                 |
|                                                 | H  | 0.51564  | 1s(0.48)                                       |
|                                                 | H  | 0.51605  | 1s(0.48)                                       |
|                                                 | H  | 0.51613  | 1s(0.48)                                       |
|                                                 | H  | 0.51563  | 1s(0.48)                                       |
|                                                 | O  | -0.05878 | [core]2s(1.80)2p(4.22)3s(0.02)3p(0.01)3d(0.01) |
|                                                 | O  | -0.97712 | [core]2s(1.73)2p(5.24)3p(0.01)                 |
|                                                 | O  | 0.07874  | [core]2s(1.81)2p(4.08)3s(0.01)3p(0.01)3d(0.01) |
|                                                 | O  | -0.97935 | [core]2s(1.72)2p(5.24)3p(0.01)                 |
| <b>AgOH<sup>-</sup></b>                         | Ag | -0.15658 | [core]5s(1.05)4d(9.93)5p(0.16)6s(0.01)         |
|                                                 | H  | 0.40732  | 1s(0.58)2p(0.01)                               |
|                                                 | O  | -1.25074 | [core]2s(1.85)2p(5.39)3p(0.01)3d(0.01)         |
| <b>AgOH<sub>2</sub><sup>-</sup></b>             | Ag | 0.34306  | [core]5s(0.71)4d(9.84)5p(0.11)                 |
|                                                 | H  | -0.52319 | 1s(1.51)2s(0.01)                               |
|                                                 | H  | 0.41388  | 1s(0.58)                                       |
|                                                 | O  | -1.23375 | [core]2s(1.82)2p(5.40)3p(0.01)3d(0.01)         |
| <b>AgOH<sub>3</sub><sup>-</sup></b>             | Ag | -0.37102 | [core]5s(1.13)4d(9.94)5p(0.28)6s(0.02)         |
|                                                 | H  | -0.558   | 1s(1.55)                                       |
|                                                 | H  | 0.44815  | 1s(0.53)2s(0.02)                               |
|                                                 | H  | 0.44815  | 1s(0.53)2s(0.02)                               |
|                                                 | O  | -0.9673  | [core]2s(1.76)2p(5.20)3p(0.01)3d(0.01)         |
| <b>AgOH<sub>4</sub><sup>-</sup></b>             | Ag | 0.13164  | [core]5s(0.83)4d(9.89)5p(0.15)                 |
|                                                 | H  | 0.45138  | 1s(0.54)                                       |
|                                                 | H  | -0.56779 | 1s(1.56)                                       |
|                                                 | H  | -0.53377 | 1s(1.53)                                       |
|                                                 | H  | 0.50514  | 1s(0.49)                                       |
|                                                 | O  | -0.98659 | [core]2s(1.75)2p(5.22)3p(0.01)3d(0.01)         |
| <b>AgO<sub>2</sub>H<sup>-</sup></b>             | Ag | 0.59406  | [core]5s(0.57)4d(9.75)5p(0.08)                 |
|                                                 | H  | 0.41553  | 1s(0.58)2p(0.01)                               |
|                                                 | O  | -1.21411 | [core]2s(1.83)2p(5.37)3p(0.01)3d(0.01)         |
|                                                 | O  | -0.79548 | [core]2s(1.96)2p(4.83)3d(0.01)                 |
| <b>AgO<sub>2</sub>H<sub>2</sub><sup>-</sup></b> | Ag | 0.60099  | [core]5s(0.54)4d(9.78)5p(0.07)                 |
|                                                 | H  | 0.41441  | 2s(0.58)                                       |
|                                                 | H  | 0.4144   | 2s(0.58)                                       |
|                                                 | O  | -1.2149  | [core]2s(1.83)2p(5.37)3p(0.01)3d(0.01)         |
|                                                 | O  | -1.2149  | [core]2s(1.83)2p(5.37)3p(0.01)3d(0.01)         |
| <b>AgO<sub>2</sub>H<sub>3</sub><sup>-</sup></b> | Ag | -0.11783 | [core]5s(1.03)4d(9.94)5p(0.14)6s(0.01)         |
|                                                 | H  | 0.43826  | 1s(0.56)                                       |
|                                                 | H  | 0.51298  | 1s(0.48)                                       |
|                                                 | H  | 0.42724  | 1s(0.57)                                       |

|                                                 |    |          |                                                |
|-------------------------------------------------|----|----------|------------------------------------------------|
|                                                 | O  | -1.00693 | [core]2s(1.75)2p(5.24)3p(0.01)3d(0.01)         |
|                                                 | O  | -1.25371 | [core]2s(1.83)2p(5.40)3p(0.01)                 |
| <b>AgO<sub>2</sub>H<sub>4</sub><sup>-</sup></b> | Ag | 0.3538   | [core]5s(0.71)4d(9.84)5p(0.09)                 |
|                                                 | H  | -0.50802 | 1s(1.50)2s(0.01)                               |
|                                                 | H  | 0.43885  | 1s(0.55)                                       |
|                                                 | H  | 0.51247  | 1s(0.48)                                       |
|                                                 | H  | 0.43189  | 1s(0.56)                                       |
|                                                 | O  | -1.2237  | [core]2s(1.81)2p(5.39)3p(0.01)                 |
|                                                 | O  | -1.00528 | [core]2s(1.75)2p(5.24)3p(0.01)3d(0.01)         |
| <b>AgO<sub>3</sub>H<sup>-</sup></b>             | Ag | 0.6194   | [core]5s(0.50)4d(9.80)5p(0.07)                 |
|                                                 | H  | 0.41727  | 1s(0.57)                                       |
|                                                 | O  | -1.21579 | [core]2s(1.83)2p(5.37)3p(0.01)3d(0.01)         |
|                                                 | O  | -0.4646  | [core]2s(1.83)2p(4.60)3s(0.01)3p(0.01)3d(0.01) |
|                                                 | O  | -0.35628 | [core]2s(1.86)2p(4.47)3s(0.01)3p(0.01)         |
| <b>AgO<sub>3</sub>H<sub>2</sub><sup>-</sup></b> | Ag | 0.60541  | [core]5s(0.53)4d(9.78)5p(0.07)                 |
|                                                 | H  | 0.41542  | 1s(0.58)                                       |
|                                                 | H  | 0.4225   | 1s(0.57)                                       |
|                                                 | O  | -1.21494 | [core]2s(1.83)2p(5.37)3p(0.01)3d(0.01)         |
|                                                 | O  | -0.67707 | [core]2s(1.88)2p(4.77)3s(0.01)3p(0.01)         |
|                                                 | O  | -0.55132 | [core]2s(1.77)2p(4.76)3p(0.01)4d(0.01)         |
| <b>AgO<sub>3</sub>H<sub>3</sub><sup>-</sup></b> | Ag | 1.00091  | [core]5s(0.34)4d(9.48)5p(0.17)                 |
|                                                 | H  | 0.43357  | 1s(0.56)                                       |
|                                                 | H  | 0.4251   | 1s(0.57)                                       |
|                                                 | H  | 0.42091  | 1s(0.57)                                       |
|                                                 | O  | -1.00939 | [core]2s(1.84)2p(5.16)3p(0.01)3d(0.01)         |
|                                                 | O  | -1.13127 | [core]2s(1.82)2p(5.29)3p(0.01)3d(0.01)         |
|                                                 | O  | -1.13983 | [core]2s(1.82)2p(5.30)3p(0.01)3d(0.01)         |
| <b>AgO<sub>3</sub>H<sub>4</sub><sup>-</sup></b> | Ag | 0.6224   | [core]5s(0.52)4d(9.78)5p(0.07)                 |
|                                                 | H  | 0.41706  | 1s(0.57)                                       |
|                                                 | H  | 0.43298  | 1s(0.56)                                       |
|                                                 | H  | 0.5115   | 1s(0.48)                                       |
|                                                 | H  | 0.44001  | 1s(0.55)                                       |
|                                                 | O  | -1.00224 | [core]2s(1.75)2p(5.24)3p(0.01)3d(0.01)         |
|                                                 | O  | -1.21248 | [core]2s(1.82)2p(5.38)3p(0.01)3d(0.01)         |
|                                                 | O  | -1.20922 | [core]2s(1.83)2p(5.37)3p(0.01)3d(0.01)         |
| <b>AgO<sub>4</sub>H<sup>-</sup></b>             | Ag | 0.63203  | [core]5s(0.46)4d(9.82)5p(0.08)                 |
|                                                 | H  | 0.41793  | 1s(0.57)2p(0.01)                               |
|                                                 | O  | -0.55785 | [core]2s(1.86)2p(4.67)3s(0.01)3p(0.01)         |
|                                                 | O  | -1.22153 | [core]2s(1.83)2p(5.38)3d(0.01)                 |
|                                                 | O  | -0.35447 | [core]2s(1.85)2p(4.48)3p(0.01)3d(0.01)         |
|                                                 | O  | 0.08389  | [core]2s(1.71)2p(4.16)3s(0.02)3p(0.01)3d(0.01) |
| <b>AgO<sub>4</sub>H<sub>2</sub><sup>-</sup></b> | Ag | 0.60302  | [core]5s(0.54)4d(9.78)5p(0.07)                 |
|                                                 | H  | 0.41488  | 1s(0.58)2p(0.01)                               |
|                                                 | H  | 0.4161   | 1s(0.58)2p(0.01)                               |

|                                                 |    |          |                                                |
|-------------------------------------------------|----|----------|------------------------------------------------|
|                                                 | O  | -0.00081 | [core]2s(1.81)2p(4.16)3s(0.02)3p(0.01)3d(0.01) |
|                                                 | O  | -0.00156 | [core]2s(1.81)2p(4.16)3s(0.02)3p(0.01)3d(0.01) |
|                                                 | O  | -1.21419 | [core]2s(1.83)2p(5.37)3p(0.01)3d(0.01)         |
|                                                 | O  | -1.21745 | [core]2s(1.83)2p(5.37)3p(0.01)3d(0.01)         |
| <b>AgO<sub>4</sub>H<sub>3</sub><sup>-</sup></b> | Ag | 0.63983  | [core]5s(0.49)4d(9.80)5p(0.06)                 |
|                                                 | H  | 0.4939   | 1s(0.50)                                       |
|                                                 | H  | 0.41968  | 1s(0.57)                                       |
|                                                 | H  | 0.45844  | 1s(0.53)                                       |
|                                                 | O  | -0.97854 | [core]2s(1.75)2p(5.21)3p(0.01)3d(0.01)         |
|                                                 | O  | -0.33363 | [core]2s(1.85)2p(4.46)3s(0.01)3p(0.01)         |
|                                                 | O  | -0.48865 | [core]2s(1.82)2p(4.63)3s(0.01)3p(0.02)3d(0.01) |
|                                                 | O  | -1.21102 | [core]2s(1.83)2p(5.37)3d(0.01)                 |
| <b>AgO<sub>4</sub>H<sub>4</sub><sup>-</sup></b> | Ag | 1.19441  | [core]5s(0.34)4d(9.15)5p(0.30)                 |
|                                                 | H  | 0.44713  | 2s(0.55)                                       |
|                                                 | H  | 0.4471   | 2s(0.55)                                       |
|                                                 | H  | 0.44702  | 2s(0.55)                                       |
|                                                 | H  | 0.44702  | 2s(0.55)                                       |
|                                                 | O  | -0.99575 | [core]2s(1.81)2p(5.17)3d(0.01)                 |
|                                                 | O  | -0.99579 | [core]2s(1.81)2p(5.17)3d(0.01)                 |
|                                                 | O  | -0.99554 | [core]2s(1.81)2p(5.17)3d(0.01)                 |
|                                                 | O  | -0.9956  | [core]2s(1.81)2p(5.17)3d(0.01)                 |

---

**Table S5**

The values of second order perturbation energies ( $E^{(2)}$ ) corresponding to the most dominant donor (D)-acceptor (A) interactions of the  $\text{AgO}_k\text{H}_m^\pm$  clusters, where  $k, m = 1 - 4$ , obtained at the  $\omega\text{B97XD}$  level of theory. For open-shell systems, the most dominant D-A interactions for both  $\alpha$  and  $\beta$  spin orbitals are provided.

| Systems                    | Donor NBO (i)    | Acceptor NBO (j)   | $E^{(2)}$ (eV) |
|----------------------------|------------------|--------------------|----------------|
| $\text{AgOH}^+$            | LP (2) O 3       | LV (1) Ag 1        | 0.35346        |
|                            | LP (3) O 3       | LV (1) Ag 1        | 0.23048        |
| $\text{AgOH}_2^+$          | LP (2) O 4       | LV (1) Ag 1        | 0.49192        |
| $\text{AgOH}_3^+$          | LP (2) O 5       | BD*( 1) Ag 1 - H 4 | 0.49063        |
|                            | LP (2) O 5       | LV (1) Ag 1        | 0.35518        |
| $\text{AgOH}_4^+$          | BD (1) H 2 - H 5 | LV (1) Ag 1        | 1.22808        |
| $\text{AgO}_2\text{H}^+$   | LP (2) O 4       | LV (1) Ag 1        | 0.42570        |
|                            | LP (3) O 4       | LV (1) Ag 1        | 0.31304        |
| $\text{AgO}_2\text{H}_2^+$ | LP (2) O 5       | LV (1) Ag 1        | 0.2365         |
| $\text{AgO}_2\text{H}_3^+$ | LP (2) O 6       | LV (1) Ag 1        | 0.66521        |
|                            | LP (3) O 6       | LV (1) Ag 1        | 0.47902        |
| $\text{AgO}_2\text{H}_4^+$ | LP (2) O 7       | LV (1) Ag 1        | 0.90687        |
| $\text{AgO}_3\text{H}^+$   | LP (2) O 5       | BD*(1) O 3 - O 4   | 1.02985        |
|                            | LP (3) O 5       | BD*(1) O 3 - O 4   | 0.84624        |
| $\text{AgO}_3\text{H}_2^+$ | LP (2) O 6       | LV (1) Ag 1        | 0.31390        |
|                            | LP (2) O 6       | LV (1) Ag 1        | 0.31605        |
| $\text{AgO}_3\text{H}_3^+$ | LP (2) O 6       | LV (1) Ag 1        | 0.63812        |
|                            | LP (3) O 6       | LV (1) Ag 1        | 0.50396        |
| $\text{AgO}_3\text{H}_4^+$ | LP (2) O 7       | LV (1) Ag 1        | 0.85570        |
| $\text{AgO}_4\text{H}^+$   | LP (2) O 5       | LV (1) Ag 1        | 0.51127        |
|                            | LP (3) O 5       | LV (1) Ag 1        | 0.38528        |
| $\text{AgO}_4\text{H}_2^+$ | LP (3) O 6       | BD*(1) O 5 - O 7   | 10.50748       |
| $\text{AgO}_4\text{H}_3^+$ | LP (2) O 8       | LV (1) Ag 1        | 0.59856        |
|                            | LP (3) O 8       | LV (1) Ag 1        | 0.43731        |
| $\text{AgO}_4\text{H}_4^+$ | LP (2) O 7       | LV (1) Ag 1        | 0.43774        |
|                            | LP (2) O 7       | LV (1) Ag 1        | 0.43215        |

|                                                 |             |                   |          |
|-------------------------------------------------|-------------|-------------------|----------|
| <b>AgOH<sup>-</sup></b>                         | LP (6) Ag 1 | R Y (1) O 3       | 0.58265  |
|                                                 | LP (3) O 3  | R Y (1) Ag 1      | 0.49278  |
| <b>AgOH<sub>2</sub><sup>-</sup></b>             | LP (3) O 4  | BD*(1) Ag 1 - H 2 | 3.09041  |
| <b>AgOH<sub>3</sub><sup>-</sup></b>             | LP (1) H 2  | R Y (1) Ag 1      | 2.79543  |
|                                                 | LP (1) H 2  | R Y (10) H 2      | 1.85760  |
| <b>AgOH<sub>4</sub><sup>-</sup></b>             | LP (1) H 3  | BD*(1) Ag 1 - H 4 | 11.41134 |
| <b>AgO<sub>2</sub>H<sup>-</sup></b>             | LP (3) O 3  | BD*(1) Ag 1 - O 4 | 1.71871  |
|                                                 | LP (3) O 3  | BD*(1) Ag 1 - O 4 | 1.63529  |
| <b>AgO<sub>2</sub>H<sub>2</sub><sup>-</sup></b> | LP (3) O 4  | BD*(1) Ag 1 - O 5 | 3.41291  |
| <b>AgO<sub>2</sub>H<sub>3</sub><sup>-</sup></b> | LP (6) Ag 1 | R Y (1) O 6       | 0.74648  |
|                                                 | LP (2) O 6  | BD*(1) H 3 - O 5  | 0.53062  |
| <b>AgO<sub>2</sub>H<sub>4</sub><sup>-</sup></b> | LP (3) O 6  | BD*(1) Ag 1 - H 2 | 2.70556  |
| <b>AgO<sub>3</sub>H<sup>-</sup></b>             | LP (2) O 4  | BD*(1) Ag 1 - O 3 | 1.46587  |
|                                                 | LP (3) O 4  | BD*(1) Ag 1 - O 3 | 1.20744  |
| <b>AgO<sub>3</sub>H<sub>2</sub><sup>-</sup></b> | LP (3) O 5  | BD*(1) Ag 1 - O 4 | 3.25983  |
| <b>AgO<sub>3</sub>H<sub>3</sub><sup>-</sup></b> | LP (3) O 7  | BD*(1) Ag 1 - O 6 | 2.53528  |
|                                                 | LP (3) O 6  | LV (1) Ag 1       | 1.69033  |
| <b>AgO<sub>3</sub>H<sub>4</sub><sup>-</sup></b> | LP (3) O 7  | BD*(1) Ag 1 - O 8 | 2.99882  |
| <b>AgO<sub>4</sub>H<sup>-</sup></b>             | LP (3) O 3  | BD*(1) O 5 - O 6  | 1.94876  |
|                                                 | LP (3) O 3  | BD*(1) Ag 1 - O 4 | 1.04275  |
| <b>AgO<sub>4</sub>H<sub>2</sub><sup>-</sup></b> | LP (3) O 7  | BD*(1) Ag 1 - O 6 | 1.68947  |
|                                                 | LP (3) O 7  | BD*(1) Ag 1 - O 6 | 1.6856   |
| <b>AgO<sub>4</sub>H<sub>3</sub><sup>-</sup></b> | LP (2) O 7  | BD*(1) Ag 1 - O 8 | 1.22593  |
|                                                 | LP (3) O 7  | BD*(1) Ag 1 - O 8 | 1.07672  |
| <b>AgO<sub>4</sub>H<sub>4</sub><sup>-</sup></b> | LP (3) O 8  | BD*(1) Ag 1 - O 6 | 6.56825  |
|                                                 | LP (3) O 7  | BD*(1) Ag 1 - O 9 | 6.56438  |

**Table S6**

QTAIM topology parameters including electron density  $\rho(\mathbf{BCP})$ , Laplacian of electron density  $\nabla^2\rho(\mathbf{BCP})$ , kinetic electron density  $G(\mathbf{BCP})$ , potential of electron density  $V(\mathbf{BCP})$ , and  $G(\mathbf{BCP})/|V(\mathbf{BCP})|$  ratio of the  $\text{AgO}_k\text{H}_m^\pm$  clusters, where  $k, m = 1 - 4$ , calculated at the  $\omega\text{B97XD}$  level of theory.

| Systems                                         | BCP(3,-1) | $\rho(\mathbf{BCP})$ | $\nabla^2\rho(\mathbf{BCP})$ | $G(\mathbf{BCP})$ | $V(\mathbf{BCP})$ | $G(\mathbf{BCP})/ V(\mathbf{BCP}) $ |
|-------------------------------------------------|-----------|----------------------|------------------------------|-------------------|-------------------|-------------------------------------|
| <b>AgOH<sup>+</sup></b>                         | 4         | 0.0493               | 0.2346                       | 0.0618            | -0.0651           | 0.949308756                         |
|                                                 | 5         | 0.3521               | -2.6673                      | 0.0591            | -0.7850           | 0.075286624                         |
| <b>AgOH<sub>2</sub><sup>+</sup></b>             | 5         | 0.3625               | -2.7555                      | 0.0653            | -0.8195           | 0.079682733                         |
|                                                 | 6         | 0.0561               | 0.2747                       | 0.0739            | -0.0791           | 0.93426043                          |
|                                                 | 7         | 0.3625               | -2.7555                      | 0.0653            | -0.8195           | 0.079682733                         |
| <b>AgOH<sub>3</sub><sup>+</sup></b>             | 6         | 0.3613               | -2.7573                      | 0.0642            | -0.8177           | 0.078512902                         |
|                                                 | 7         | 0.1259               | -0.0444                      | 0.0694            | -0.1498           | 0.463284379                         |
|                                                 | 8         | 0.0604               | 0.3090                       | 0.0836            | -0.0900           | 0.928888889                         |
|                                                 | 9         | 0.3613               | -2.7574                      | 0.0642            | -0.8177           | 0.078512902                         |
| <b>AgOH<sub>4</sub><sup>+</sup></b>             | 7         | 0.3622               | -2.7599                      | 0.0648            | -0.8195           | 0.079072605                         |
|                                                 | 8         | 0.0623               | 0.3039                       | 0.0836            | -0.0913           | 0.915662651                         |
|                                                 | 9         | 0.0554               | 0.1924                       | 0.0546            | -0.0611           | 0.893617021                         |
|                                                 | 10        | 0.2536               | -1.0906                      | 0.0027            | -0.2781           | 0.009708738                         |
|                                                 | 11        | 0.3622               | -2.7596                      | 0.0648            | -0.8195           | 0.079072605                         |
| <b>AgO<sub>2</sub>H<sup>+</sup></b>             | 5         | 0.3573               | -2.7494                      | 0.0548            | -0.7970           | 0.068757842                         |
|                                                 | 6         | 0.3767               | -0.0033                      | 0.2940            | -0.5888           | 0.499320652                         |
|                                                 | 7         | 0.0509               | 0.2282                       | 0.0615            | -0.0660           | 0.931818182                         |
| <b>AgO<sub>2</sub>H<sub>2</sub><sup>+</sup></b> | 6         | 0.3630               | -2.7567                      | 0.0620            | -0.8132           | 0.076242007                         |
|                                                 | 7         | 0.0329               | 0.1610                       | 0.0397            | -0.0392           | 1.012755102                         |
|                                                 | 8         | 0.2654               | 0.1239                       | 0.1817            | -0.3325           | 0.546466165                         |
|                                                 | 9         | 0.0329               | 0.1611                       | 0.0398            | -0.0392           | 1.015306122                         |
|                                                 | 10        | 0.3629               | -2.7565                      | 0.0620            | -0.8132           | 0.076242007                         |
| <b>AgO<sub>2</sub>H<sub>3</sub><sup>+</sup></b> | 7         | 0.3629               | -2.7621                      | 0.0652            | -0.8210           | 0.079415347                         |
|                                                 | 8         | 0.0610               | 0.2981                       | 0.0818            | -0.0890           | 0.919101124                         |
|                                                 | 9         | 0.0581               | 0.2793                       | 0.0763            | -0.0828           | 0.921497585                         |
|                                                 | 10        | 0.3631               | -2.7633                      | 0.0653            | -0.8214           | 0.079498417                         |
|                                                 | 11        | 0.3531               | -2.6642                      | 0.0599            | -0.7859           | 0.07621835                          |
| <b>AgO<sub>2</sub>H<sub>4</sub><sup>+</sup></b> | 8         | 0.3636               | -2.7630                      | 0.0657            | -0.8222           | 0.079907565                         |
|                                                 | 9         | 0.3636               | -2.7631                      | 0.0657            | -0.8222           | 0.079907565                         |
|                                                 | 10        | 0.0602               | 0.2967                       | 0.0812            | -0.0881           | 0.921679909                         |
|                                                 | 11        | 0.3636               | -2.7631                      | 0.0657            | -0.8222           | 0.079907565                         |
|                                                 | 12        | 0.0602               | 0.2967                       | 0.0812            | -0.0881           | 0.921679909                         |
|                                                 | 13        | 0.3636               | -2.7631                      | 0.0657            | -0.8222           | 0.079907565                         |

|                                                 |    |        |         |        |         |             |
|-------------------------------------------------|----|--------|---------|--------|---------|-------------|
| <b>AgO<sub>3</sub>H<sup>+</sup></b>             | 6  | 0.4513 | -0.1872 | 0.3904 | -0.8275 | 0.471782477 |
|                                                 | 7  | 0.0331 | 0.1376  | 0.0346 | -0.0349 | 0.991404011 |
|                                                 | 8  | 0.0200 | 0.1015  | 0.0221 | -0.0189 | 1.169312169 |
|                                                 | 9  | 0.2500 | 0.2178  | 0.1876 | -0.3207 | 0.584970377 |
|                                                 | 10 | 0.0344 | 0.1643  | 0.0408 | -0.0405 | 1.007407407 |
|                                                 | 11 | 0.3534 | -2.6974 | 0.0590 | -0.7924 | 0.074457345 |
| <b>AgO<sub>3</sub>H<sub>2</sub><sup>+</sup></b> | 7  | 0.3628 | -2.7588 | 0.0654 | -0.8204 | 0.079717211 |
|                                                 | 8  | 0.0584 | 0.2855  | 0.0775 | -0.0837 | 0.925925926 |
|                                                 | 9  | 0.0348 | 0.1611  | 0.0406 | -0.0409 | 0.992665037 |
|                                                 | 10 | 0.3628 | -2.7588 | 0.0654 | -0.8204 | 0.079717211 |
|                                                 | 11 | 0.5146 | -0.4960 | 0.4577 | -1.0394 | 0.440350202 |
| <b>AgO<sub>3</sub>H<sub>3</sub><sup>+</sup></b> | 8  | 0.0562 | 0.2572  | 0.0708 | -0.0774 | 0.914728682 |
|                                                 | 9  | 0.3764 | -0.0034 | 0.2935 | -0.5878 | 0.499319496 |
|                                                 | 10 | 0.3584 | -2.7497 | 0.0556 | -0.7986 | 0.069621838 |
|                                                 | 11 | 0.0602 | 0.2953  | 0.0807 | -0.0877 | 0.92018244  |
|                                                 | 12 | 0.3634 | -2.7618 | 0.0656 | -0.8217 | 0.079834489 |
|                                                 | 13 | 0.3634 | -2.7618 | 0.0656 | -0.8217 | 0.079834489 |
| <b>AgO<sub>3</sub>H<sub>4</sub><sup>+</sup></b> | 9  | 0.3637 | -2.7620 | 0.0658 | -0.8222 | 0.08002919  |
|                                                 | 10 | 0.3637 | -2.7703 | 0.0621 | -0.8167 | 0.076037713 |
|                                                 | 11 | 0.0524 | 0.2497  | 0.0672 | -0.0721 | 0.932038835 |
|                                                 | 12 | 0.0593 | 0.2917  | 0.0795 | -0.0861 | 0.923344948 |
|                                                 | 13 | 0.2688 | 0.1224  | 0.1848 | -0.3389 | 0.545293597 |
|                                                 | 14 | 0.3637 | -2.7620 | 0.0658 | -0.8222 | 0.08002919  |
|                                                 | 15 | 0.3655 | -2.7549 | 0.0638 | -0.8163 | 0.07815754  |
| <b>AgO<sub>4</sub>H<sup>+</sup></b>             | 7  | 0.0537 | 0.2419  | 0.0660 | -0.0715 | 0.923076923 |
|                                                 | 8  | 0.3767 | -0.0037 | 0.2939 | -0.5886 | 0.499320421 |
|                                                 | 9  | 0.3575 | -2.7494 | 0.0550 | -0.7974 | 0.068974166 |
|                                                 | 10 | 0.0346 | 0.1600  | 0.0402 | -0.0404 | 0.995049505 |
|                                                 | 11 | 0.5144 | -0.4948 | 0.4575 | -1.0387 | 0.44045441  |
| <b>AgO<sub>4</sub>H<sub>2</sub><sup>+</sup></b> | 8  | 0.3633 | -2.7606 | 0.0656 | -0.8213 | 0.079873371 |
|                                                 | 9  | 0.0418 | 0.1840  | 0.0482 | -0.0503 | 0.958250497 |
|                                                 | 10 | 0.4386 | -0.0600 | 0.3979 | -0.8108 | 0.490749877 |
|                                                 | 11 | 0.0590 | 0.2902  | 0.0789 | -0.0853 | 0.924970692 |
|                                                 | 12 | 0.0200 | 0.0841  | 0.0190 | -0.0170 | 1.117647059 |
|                                                 | 13 | 0.3633 | -2.7611 | 0.0656 | -0.8215 | 0.079853926 |
|                                                 | 14 | 0.0223 | 0.0867  | 0.0208 | -0.0199 | 1.045226131 |
|                                                 | 15 | 0.4620 | -0.1514 | 0.4264 | -0.8907 | 0.478724599 |
| <b>AgO<sub>4</sub>H<sub>3</sub><sup>+</sup></b> | 9  | 0.3526 | -2.5693 | 0.0674 | -0.7771 | 0.086732724 |
|                                                 | 10 | 0.0586 | 0.2136  | 0.0609 | -0.0683 | 0.891654466 |
|                                                 | 11 | 0.0203 | 0.0608  | 0.0140 | -0.0128 | 1.09375     |

|                                                 |    |        |         |        |         |             |
|-------------------------------------------------|----|--------|---------|--------|---------|-------------|
|                                                 | 12 | 0.5172 | -0.4545 | 0.4711 | -1.0558 | 0.446201932 |
|                                                 | 13 | 0.0576 | 0.2829  | 0.0767 | -0.0826 | 0.928571429 |
|                                                 | 14 | 0.3632 | -2.7611 | 0.0655 | -0.8212 | 0.079761325 |
|                                                 | 15 | 0.3630 | -2.7610 | 0.0653 | -0.8209 | 0.079546839 |
| <b>AgO<sub>4</sub>H<sub>4</sub><sup>+</sup></b> | 10 | 0.3640 | -2.7608 | 0.0661 | -0.8225 | 0.080364742 |
|                                                 | 11 | 0.3641 | -2.7637 | 0.0661 | -0.8232 | 0.080296404 |
|                                                 | 12 | 0.0584 | 0.2871  | 0.0781 | -0.0844 | 0.92535545  |
|                                                 | 13 | 0.0160 | 0.0646  | 0.0146 | -0.0130 | 1.123076923 |
|                                                 | 14 | 0.5161 | -0.5047 | 0.4595 | -1.0452 | 0.439628779 |
|                                                 | 15 | 0.0582 | 0.2851  | 0.0776 | -0.0839 | 0.924910608 |
|                                                 | 16 | 0.3639 | -2.7579 | 0.0662 | -0.8218 | 0.08055488  |
|                                                 | 17 | 0.3639 | -2.7578 | 0.0662 | -0.8218 | 0.08055488  |
| <b>AgOH<sup>-</sup></b>                         | 4  | 0.0750 | 0.3137  | 0.0928 | -0.1071 | 0.866479925 |
|                                                 | 5  | 0.3683 | -2.4219 | 0.0946 | -0.7946 | 0.119053612 |
| <b>AgOH<sub>2</sub><sup>-</sup></b>             | 5  | 0.1172 | 0.0837  | 0.0845 | -0.1481 | 0.570560432 |
|                                                 | 6  | 0.0851 | 0.3702  | 0.1119 | -0.1312 | 0.852896341 |
|                                                 | 7  | 0.3672 | -2.4120 | 0.0938 | -0.7906 | 0.118644068 |
| <b>AgOH<sub>3</sub><sup>-</sup></b>             | 6  | 0.3631 | -2.6342 | 0.0759 | -0.8104 | 0.093657453 |
|                                                 | 7  | 0.0054 | 0.0056  | 0.0015 | -0.0017 | 0.882352941 |
|                                                 | 8  | 0.0985 | 0.1010  | 0.0708 | -0.1164 | 0.608247423 |
|                                                 | 9  | 0.3631 | -2.6343 | 0.0759 | -0.8104 | 0.093657453 |
| <b>AgOH<sub>4</sub><sup>-</sup></b>             | 6  | 0.0998 | 0.1245  | 0.0766 | -0.1222 | 0.626841244 |
|                                                 | 7  | 0.0216 | 0.0339  | 0.0101 | -0.0117 | 0.863247863 |
|                                                 | 8  | 0.1050 | 0.1072  | 0.0775 | -0.1282 | 0.604524181 |
|                                                 | 9  | 0.3483 | -2.5853 | 0.0711 | -0.7884 | 0.09018265  |
|                                                 | 10 | 0.3706 | -2.6298 | 0.0803 | -0.8181 | 0.09815426  |
| <b>AgO<sub>2</sub>H<sup>-</sup></b>             | 5  | 0.0981 | 0.4039  | 0.1283 | -0.1556 | 0.824550129 |
|                                                 | 6  | 0.0916 | 0.3777  | 0.1178 | -0.1412 | 0.83427762  |
|                                                 | 7  | 0.3679 | -2.4374 | 0.0924 | -0.7941 | 0.116358141 |
| <b>AgO<sub>2</sub>H<sub>2</sub><sup>-</sup></b> | 6  | 0.3678 | -2.4303 | 0.0928 | -0.7931 | 0.117009204 |
|                                                 | 7  | 0.3678 | -2.4303 | 0.0928 | -0.7931 | 0.117009204 |
|                                                 | 8  | 0.0911 | 0.3762  | 0.1171 | -0.1402 | 0.835235378 |
|                                                 | 9  | 0.0911 | 0.3762  | 0.1171 | -0.1402 | 0.835235378 |
| <b>AgO<sub>2</sub>H<sub>3</sub><sup>-</sup></b> | 7  | 0.3722 | -2.5978 | 0.0838 | -0.8171 | 0.102557826 |
|                                                 | 8  | 0.3229 | -2.3871 | 0.0697 | -0.7363 | 0.094662502 |
|                                                 | 9  | 0.0511 | 0.0980  | 0.0378 | -0.0510 | 0.741176471 |
|                                                 | 10 | 0.0722 | 0.3139  | 0.0913 | -0.1041 | 0.877041306 |
|                                                 | 11 | 0.3669 | -2.4497 | 0.0913 | -0.7950 | 0.114842767 |
| <b>AgO<sub>2</sub>H<sub>4</sub><sup>-</sup></b> | 8  | 0.3723 | -2.6003 | 0.0837 | -0.8175 | 0.102385321 |



|                                                 |    |        |         |        |         |             |
|-------------------------------------------------|----|--------|---------|--------|---------|-------------|
|                                                 | 9  | 0.1189 | 0.0803  | 0.0853 | -0.1506 | 0.566401062 |
|                                                 | 10 | 0.3239 | -2.3968 | 0.0697 | -0.7387 | 0.094354948 |
|                                                 | 11 | 0.0510 | 0.0990  | 0.0379 | -0.0510 | 0.743137255 |
|                                                 | 12 | 0.0815 | 0.3648  | 0.1085 | -0.1259 | 0.861795075 |
|                                                 | 13 | 0.3683 | -2.4755 | 0.0910 | -0.8009 | 0.113622175 |
| <b>AgO<sub>3</sub>H<sup>-</sup></b>             | 6  | 0.0808 | 0.3523  | 0.1057 | -0.1234 | 0.856564019 |
|                                                 | 7  | 0.0923 | 0.3751  | 0.1176 | -0.1414 | 0.831683168 |
|                                                 | 8  | 0.3676 | -2.4426 | 0.0920 | -0.7946 | 0.115781525 |
|                                                 | 9  | 0.3408 | 0.1004  | 0.2647 | -0.5042 | 0.524990083 |
| <b>AgO<sub>3</sub>H<sub>2</sub><sup>-</sup></b> | 7  | 0.0871 | 0.3727  | 0.1140 | -0.1348 | 0.845697329 |
|                                                 | 8  | 0.2404 | 0.1698  | 0.1693 | -0.2961 | 0.571766295 |
|                                                 | 9  | 0.3760 | -2.6595 | 0.0792 | -0.8233 | 0.096198227 |
|                                                 | 10 | 0.0923 | 0.3784  | 0.1184 | -0.1423 | 0.832044975 |
|                                                 | 11 | 0.3677 | -2.4352 | 0.0924 | -0.7936 | 0.116431452 |
| <b>AgO<sub>3</sub>H<sub>3</sub><sup>-</sup></b> | 8  | 0.1016 | 0.3916  | 0.1278 | -0.1576 | 0.810913706 |
|                                                 | 9  | 0.0985 | 0.3937  | 0.1261 | -0.1538 | 0.819895969 |
|                                                 | 10 | 0.3680 | -2.5049 | 0.0881 | -0.8023 | 0.109809298 |
|                                                 | 11 | 0.3683 | -2.4761 | 0.0901 | -0.7992 | 0.112737738 |
|                                                 | 12 | 0.0855 | 0.3092  | 0.0976 | -0.1179 | 0.82782019  |
|                                                 | 13 | 0.3665 | -2.4725 | 0.0873 | -0.7928 | 0.110116044 |
| <b>AgO<sub>3</sub>H<sub>4</sub><sup>-</sup></b> | 9  | 0.3688 | -2.4914 | 0.0900 | -0.8029 | 0.11209366  |
|                                                 | 10 | 0.0877 | 0.3745  | 0.1147 | -0.1358 | 0.844624448 |
|                                                 | 11 | 0.0490 | 0.0980  | 0.0365 | -0.0486 | 0.751028807 |
|                                                 | 12 | 0.0936 | 0.3830  | 0.1203 | -0.1449 | 0.830227743 |
|                                                 | 13 | 0.3268 | -2.4238 | 0.0696 | -0.7451 | 0.09341028  |
|                                                 | 14 | 0.3678 | -2.4425 | 0.0921 | -0.7948 | 0.115878208 |
|                                                 | 15 | 0.3723 | -2.6057 | 0.0834 | -0.8182 | 0.101931068 |
| <b>AgO<sub>4</sub>H<sup>-</sup></b>             | 7  | 0.3100 | 0.1965  | 0.2490 | -0.4488 | 0.554812834 |
|                                                 | 8  | 0.0720 | 0.3242  | 0.0940 | -0.1069 | 0.879326473 |
|                                                 | 9  | 0.0190 | 0.0790  | 0.0178 | -0.0159 | 1.119496855 |
|                                                 | 10 | 0.0912 | 0.3728  | 0.1163 | -0.1395 | 0.833691756 |
|                                                 | 11 | 0.3960 | 0.0104  | 0.3334 | -0.6643 | 0.50188168  |
|                                                 | 12 | 0.0194 | 0.0728  | 0.0170 | -0.0158 | 1.075949367 |
|                                                 | 13 | 0.3674 | -2.4403 | 0.0919 | -0.7939 | 0.115757652 |
| <b>AgO<sub>4</sub>H<sub>2</sub><sup>-</sup></b> | 8  | 0.3677 | -2.4308 | 0.0927 | -0.7930 | 0.116897856 |
|                                                 | 9  | 0.5165 | -0.5096 | 0.4591 | -1.0457 | 0.439036052 |
|                                                 | 10 | 0.0914 | 0.3773  | 0.1176 | -0.1409 | 0.834634493 |
|                                                 | 11 | 0.0058 | 0.0262  | 0.0051 | -0.0037 | 1.378378378 |
|                                                 | 12 | 0.0906 | 0.3754  | 0.1167 | -0.1396 | 0.835959885 |
|                                                 | 13 | 0.3678 | -2.4369 | 0.0923 | -0.7938 | 0.11627614  |

|                                                 |    |        |         |        |         |             |
|-------------------------------------------------|----|--------|---------|--------|---------|-------------|
| <b>AgO<sub>4</sub>H<sub>3</sub><sup>-</sup></b> | 9  | 0.3676 | -2.4535 | 0.0913 | -0.7959 | 0.114712904 |
|                                                 | 10 | 0.3523 | -2.6166 | 0.0709 | -0.7959 | 0.089081543 |
|                                                 | 11 | 0.0956 | 0.3849  | 0.1220 | -0.1478 | 0.825439783 |
|                                                 | 12 | 0.0299 | 0.0877  | 0.0237 | -0.0255 | 0.929411765 |
|                                                 | 13 | 0.0788 | 0.3517  | 0.1046 | -0.1213 | 0.862324815 |
|                                                 | 14 | 0.3698 | -2.6495 | 0.0787 | -0.8198 | 0.095999024 |
|                                                 | 15 | 0.3561 | 0.0675  | 0.2794 | -0.5419 | 0.515593283 |

|                                                 |    |        |         |        |         |             |
|-------------------------------------------------|----|--------|---------|--------|---------|-------------|
| <b>AgO<sub>4</sub>H<sub>4</sub><sup>-</sup></b> | 11 | 0.3683 | -2.5699 | 0.0836 | -0.8098 | 0.103235367 |
|                                                 | 12 | 0.3684 | -2.5712 | 0.0837 | -0.8101 | 0.103320578 |
|                                                 | 13 | 0.1153 | 0.3781  | 0.1342 | -0.1738 | 0.772151899 |
|                                                 | 14 | 0.1152 | 0.3781  | 0.1341 | -0.1737 | 0.772020725 |
|                                                 | 15 | 0.3686 | -2.5738 | 0.0837 | -0.8109 | 0.103218646 |
|                                                 | 16 | 0.1153 | 0.3784  | 0.1343 | -0.1740 | 0.77183908  |
|                                                 | 17 | 0.3685 | -2.5725 | 0.0837 | -0.8106 | 0.103256847 |

---

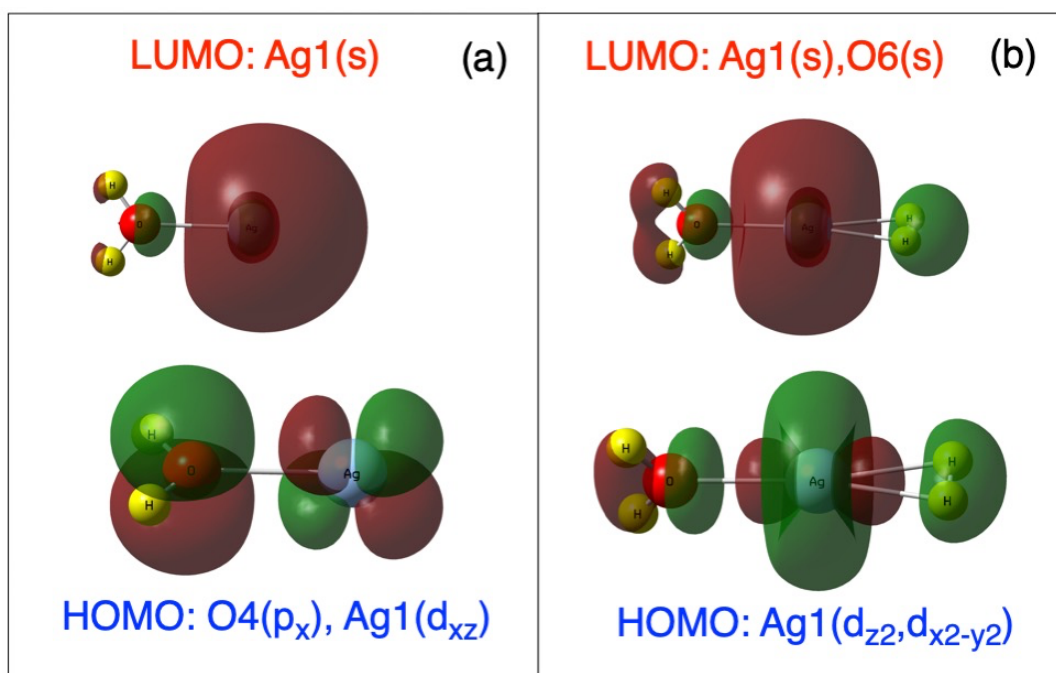

**Figure S1.** Schematic representation of HOMO (bottom) and LUMO (top) for (a)  $\text{AgOH}_2^+$  and (b)  $\text{AgOH}_4^+$  using isovalues of 0.03 obtained at  $\omega\text{B97XD}$  level of theory. The dominant atomic orbital contributions to HOMO and LUMO are reported. The atom numbers correspond to the same as in Table S1.

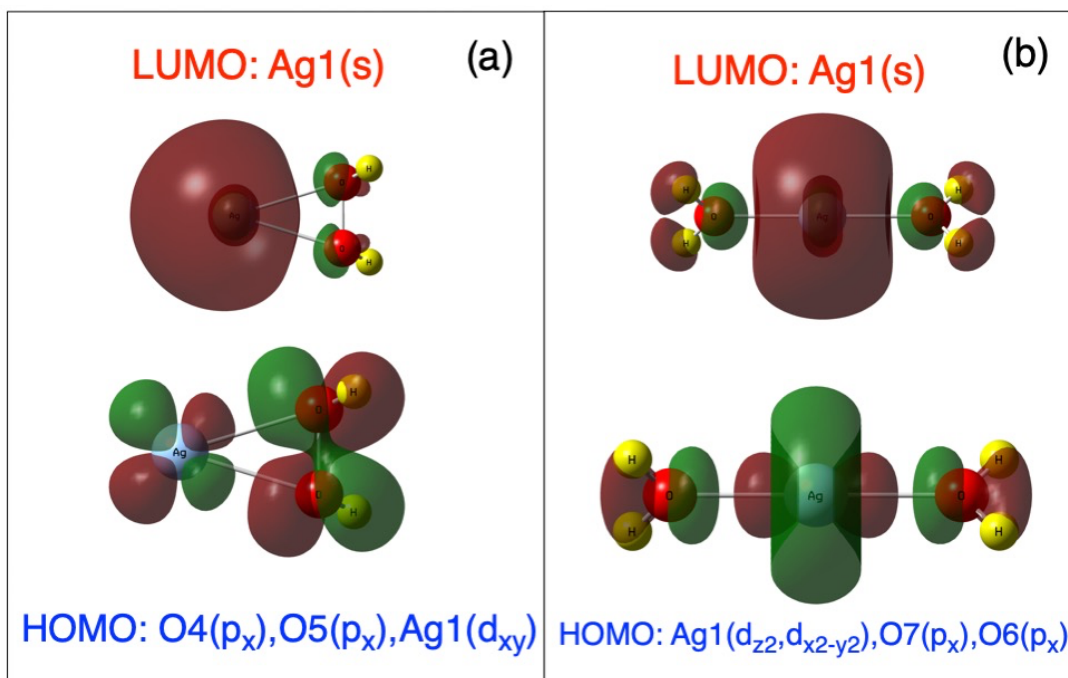

**Figure S2.** Schematic representation of HOMO (bottom) and LUMO (top) for (a)  $\text{AgO}_2\text{H}_2^+$  and (b)  $\text{AgO}_2\text{H}_4^+$  using isovalues of 0.03 obtained at  $\omega\text{B97XD}$  level of theory. The dominant atomic orbital contributions to HOMO and LUMO are reported. The atom numbers correspond to the same as in Table S1.

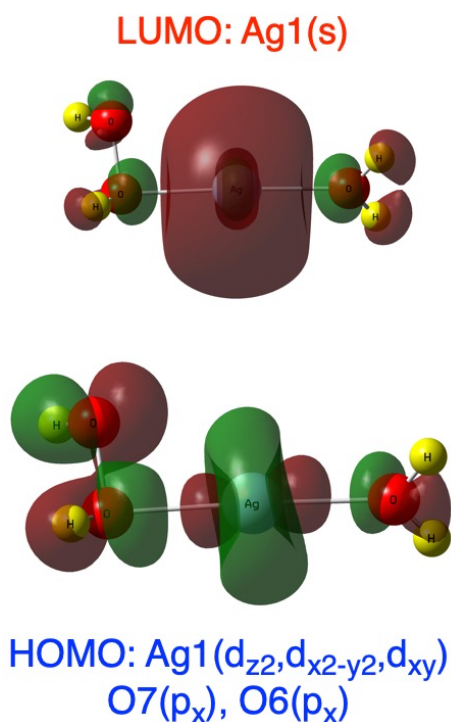

**Figure S3.** Schematic representation of HOMO (bottom) and LUMO (top) for  $\text{AgO}_3\text{H}_4^+$  using isovalues of 0.03 obtained at  $\omega\text{B97XD}$  level of theory. The dominant atomic orbital contributions to HOMO and LUMO are reported. The atom numbers correspond to the same as in Table S1.

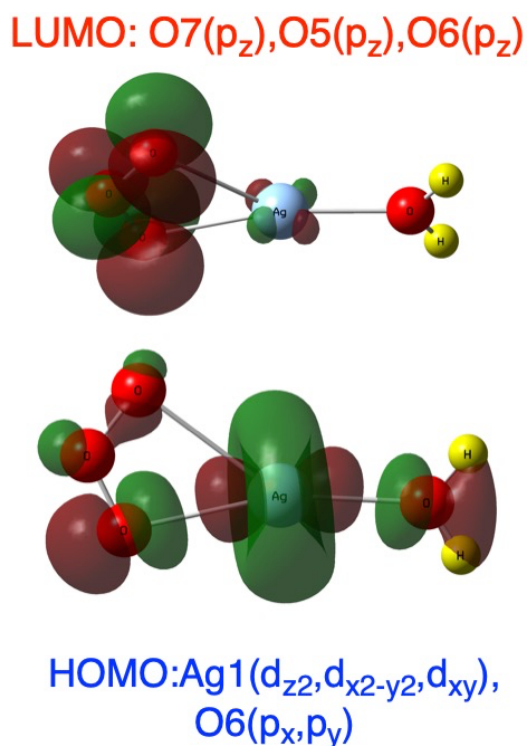

**Figure S4.** Schematic representation of HOMO (bottom) and LUMO (top) for  $\text{AgO}_4\text{H}_2^+$  using isovalues of 0.03 obtained at  $\omega\text{B97XD}$  level of theory. The dominant atomic orbital contributions to HOMO and LUMO are reported. The atom numbers correspond to the same as in Table S1.

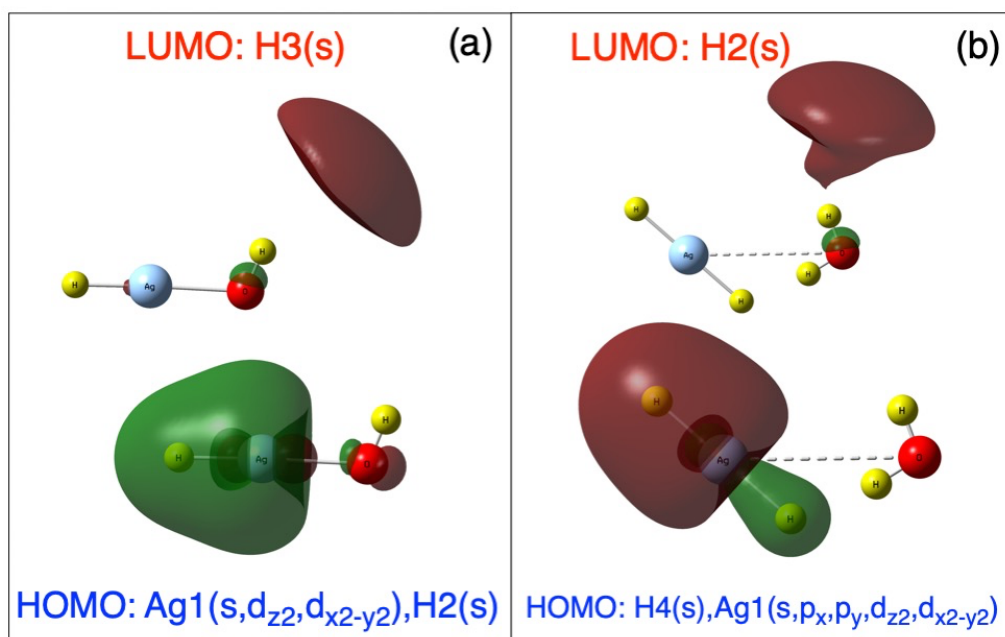

**Figure S5.** Schematic representation of HOMO (bottom) and LUMO (top) for (a)  $\text{AgOH}_2^-$  and (b)  $\text{AgOH}_4^-$  using isovalues of 0.03 obtained at  $\omega\text{B97XD}$  level of theory. The dominant atomic orbital contributions to HOMO and LUMO are reported. The atom numbers correspond to the same as in Table S1.

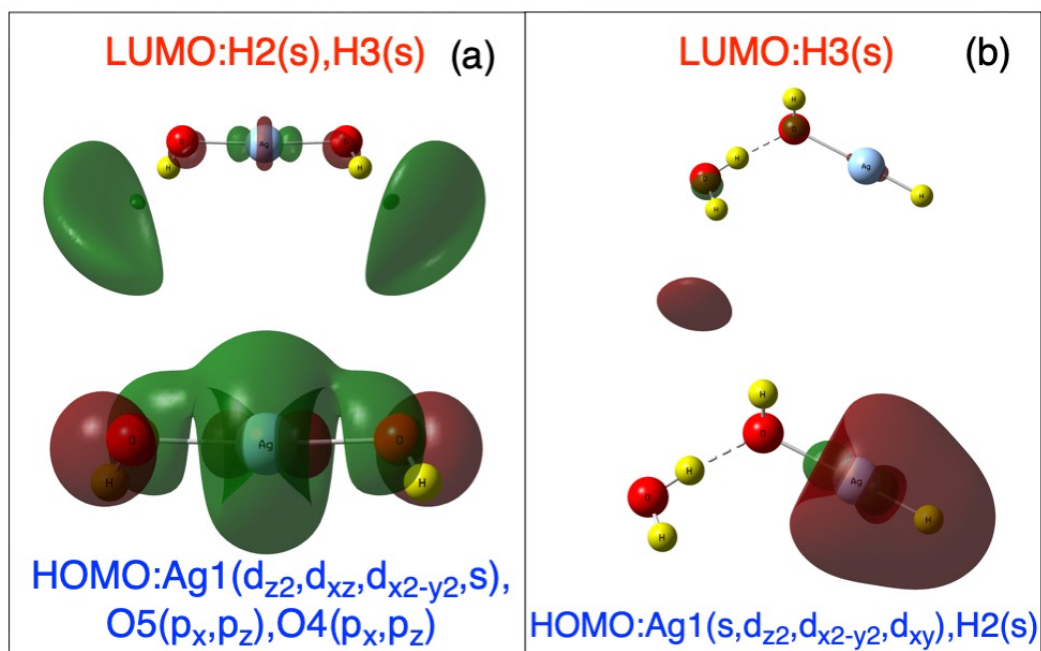

**Figure S6.** Schematic representation of HOMO (bottom) and LUMO (top) for (a)  $\text{AgO}_2\text{H}_2^-$  and (b)  $\text{AgO}_2\text{H}_4^-$  using isovalues of 0.03 obtained at  $\omega\text{B97XD}$  level of theory. The dominant atomic orbital contributions to HOMO and LUMO are reported. The atom numbers correspond to the same as in Table S1.

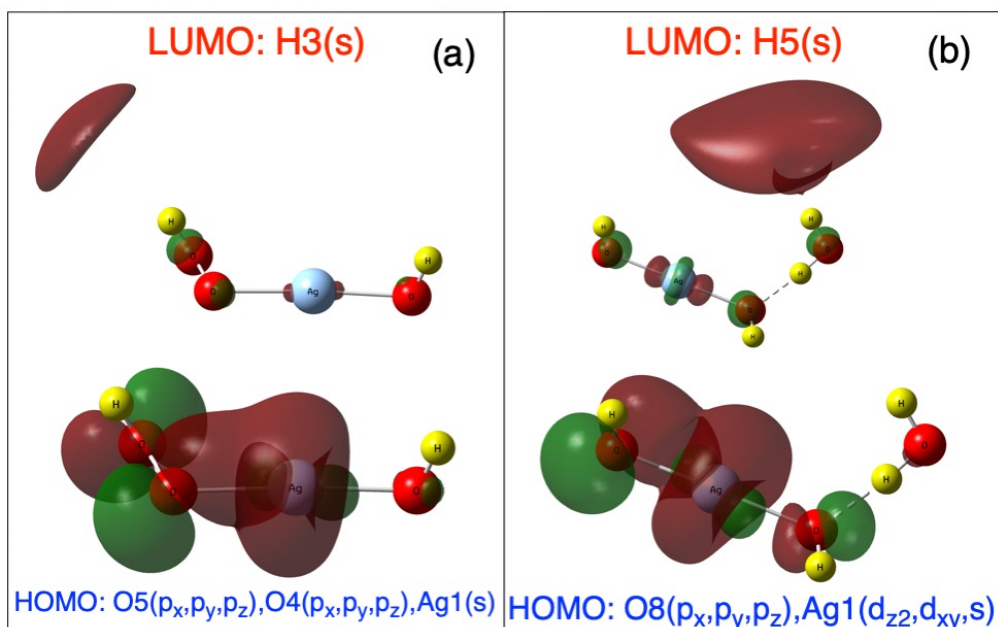

**Figure S7.** Schematic representation of HOMO (bottom) and LUMO (top) orbitals for (a)  $\text{AgO}_3\text{H}_2^-$  and (b)  $\text{AgO}_3\text{H}_4^-$  using isovalues of 0.03 obtained at  $\omega\text{B97XD}$  level of theory. The dominant atomic orbital contributions to HOMO and LUMO are reported. The atom numbers correspond to the same as in Table S1.

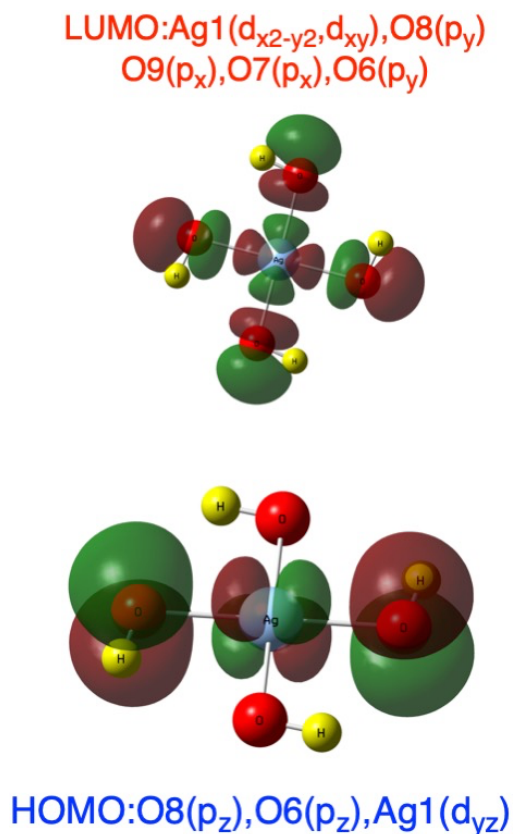

**Figure S8.** Schematic representation of HOMO (bottom) and LUMO (top) orbitals for  $\text{AgO}_4\text{H}_4^-$  using isovalues of 0.03 obtained at  $\omega\text{B97XD}$  level of theory. The dominant atomic orbital contributions to HOMO and LUMO are reported. The atom numbers correspond to the same as in Table S1.

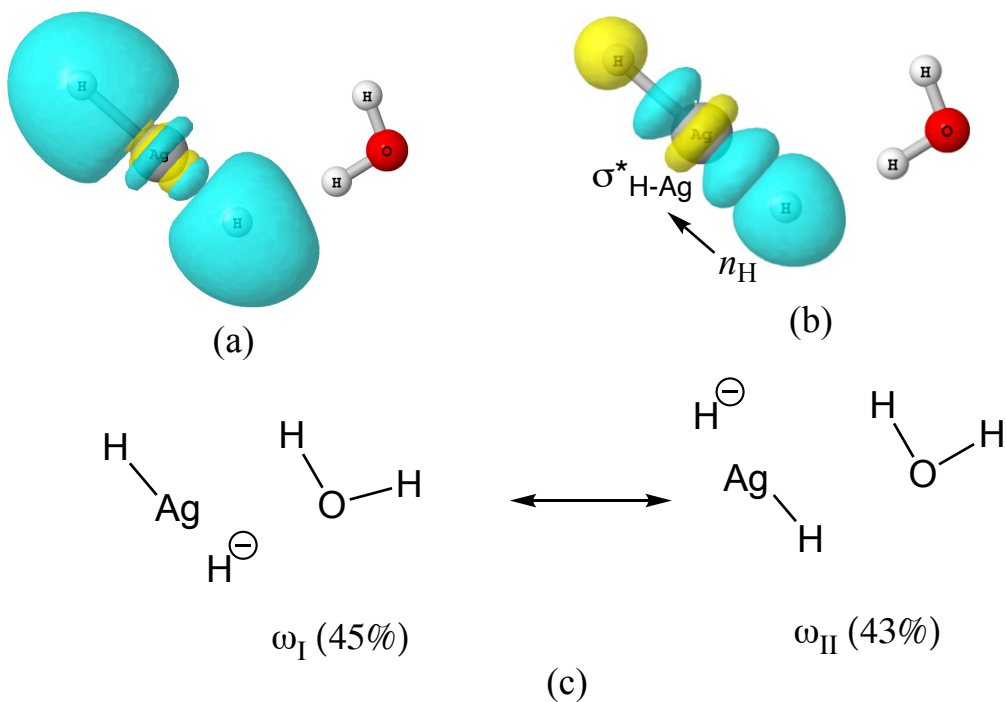

**Figure S9.** (a) 3-d surface views of leading 3c/4e Lewis-type NBOs (b) lone-pair NBO of H ( $n_H$ ) and empty  $\sigma^*$  NBO of H-Ag bond donor-acceptor pair (c) resonance structures with weights ( $\omega$ ) for AgOH<sub>4</sub><sup>-</sup> cluster.

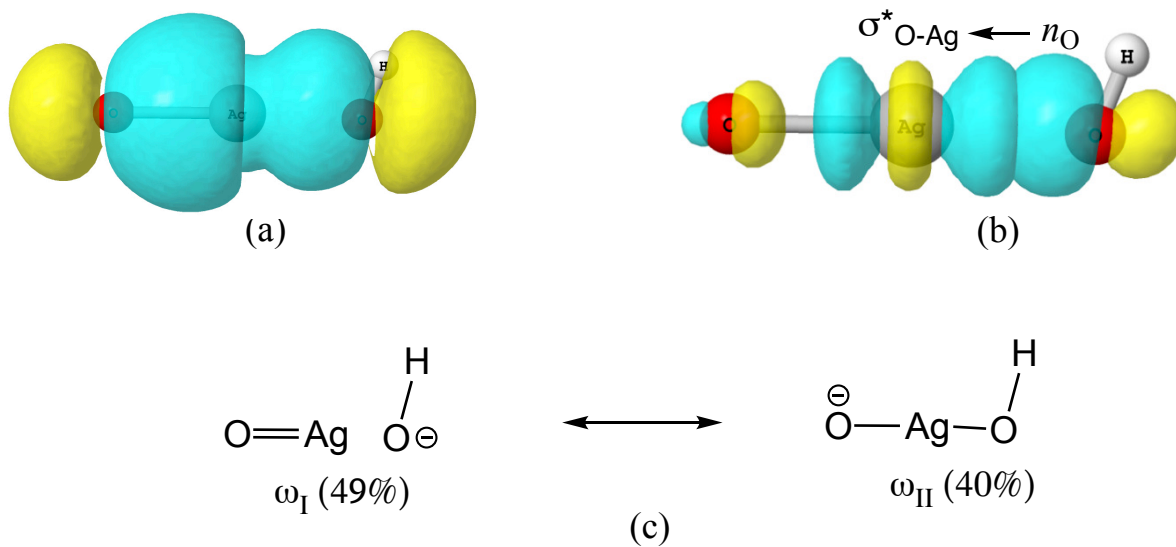

**Figure S10.** (a) 3-d surface views of leading 3c/4e Lewis-type NBOs (b) lone-pair NBO of O ( $n_O$ ) and empty  $\sigma^*$  NBO of Ag-O bond donor-acceptor pair (c) resonance structures with weights ( $\omega$ ) for AgO<sub>2</sub>H<sup>-</sup> cluster.

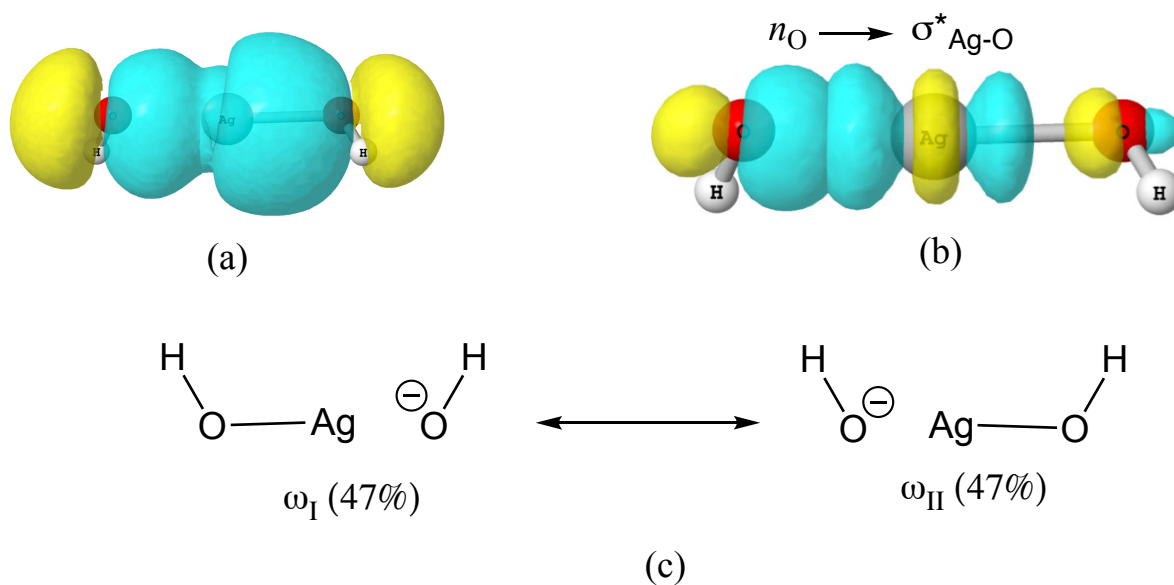

**Figure S11.** (a) 3-d surface views of leading 3c/4e Lewis-type NBOs (b) lone-pair NBO of O ( $n_{\text{O}}$ ) and empty  $\sigma^*$  NBO of Ag-O bond donor-acceptor pair (c) resonance structures with weights ( $\omega$ ) for  $\text{AgO}_2\text{H}_2^-$  cluster.

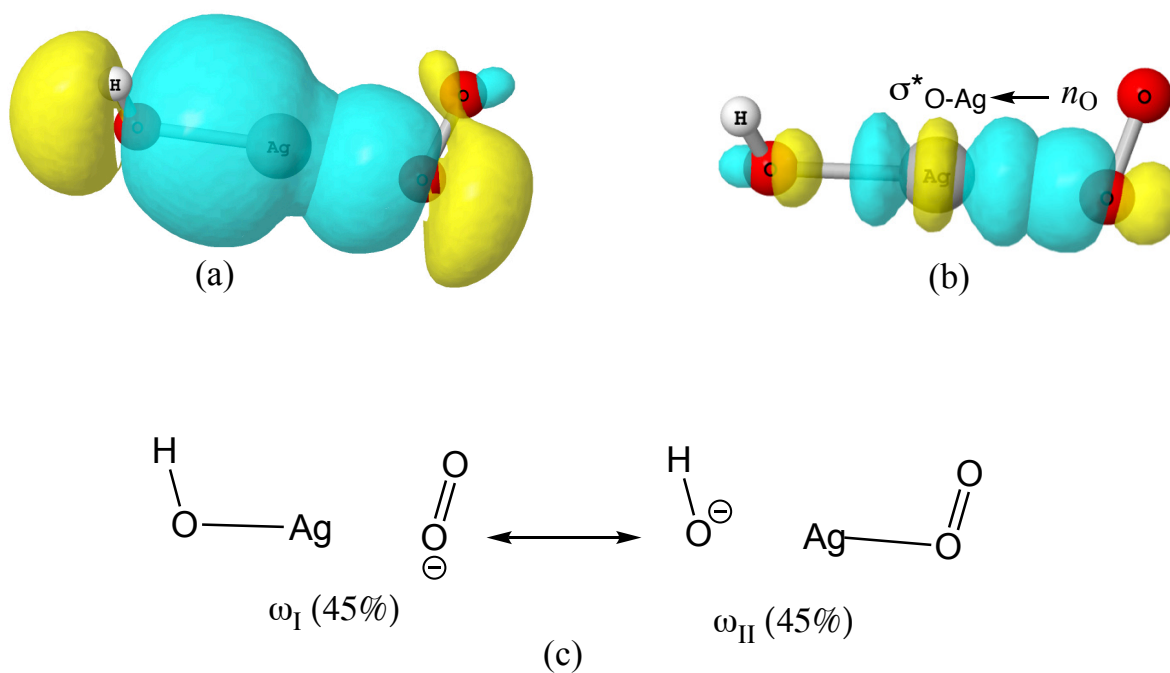

**Figure S12.** (a) 3-d surface views of leading 3c/4e Lewis-type NBOs (b) lone-pair NBO of O ( $n_{\text{O}}$ ) and empty  $\sigma^*$  NBO of Ag-O bond donor-acceptor pair (c) resonance structures with weights ( $\omega$ ) for  $\text{AgO}_3\text{H}^-$  cluster.



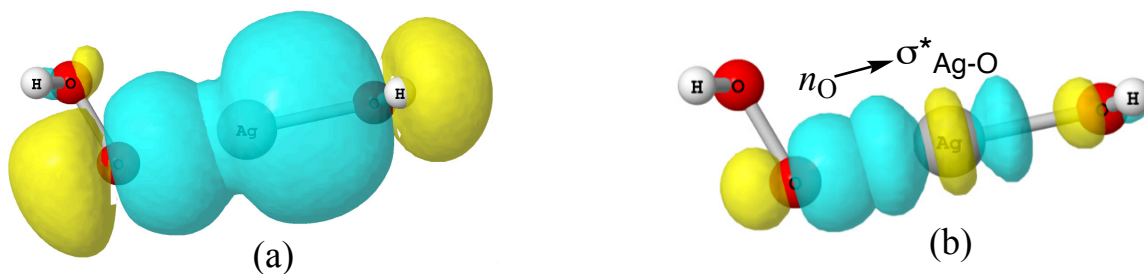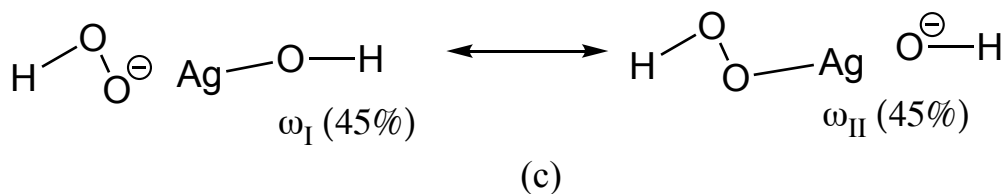

**Figure S13.** (a) 3-d surface views of leading 3c/4e Lewis-type NBOs (b) lone-pair NBO of O ( $n_O$ ) and empty  $\sigma^*$  NBO of Ag-O bond donor-acceptor pair (c) resonance structures with weights ( $\omega$ ) for  $\text{AgO}_3\text{H}_2^-$  cluster.

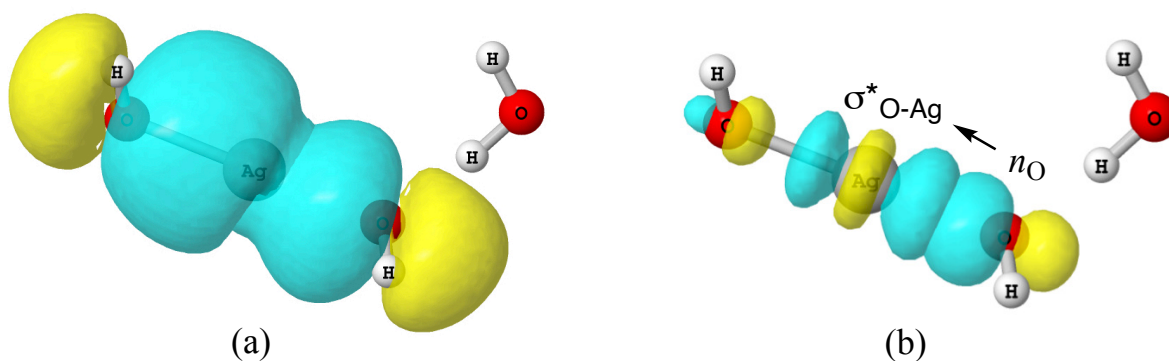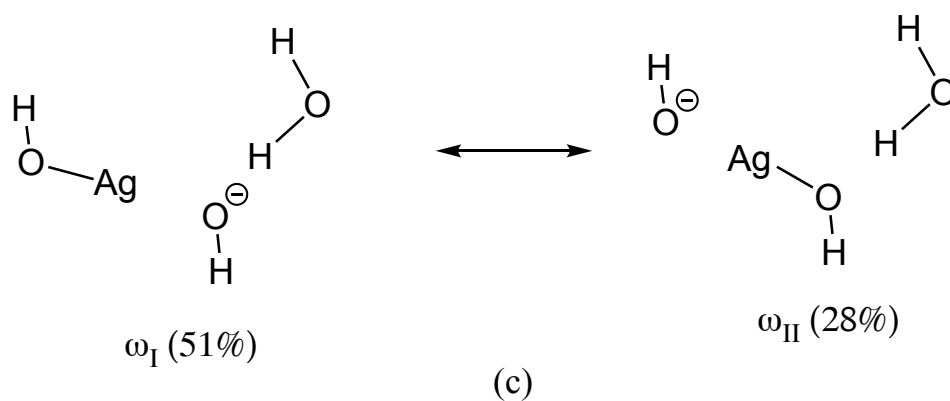

**Figure S14.** (a) 3-d surface views of leading 3c/4e Lewis-type NBOs (b) lone-pair NBO of O ( $n_O$ ) and empty  $\sigma^*$  NBO of Ag-O bond donor-acceptor pair (c) resonance structures with weights ( $\omega$ ) for  $\text{AgO}_3\text{H}_4^-$  cluster.

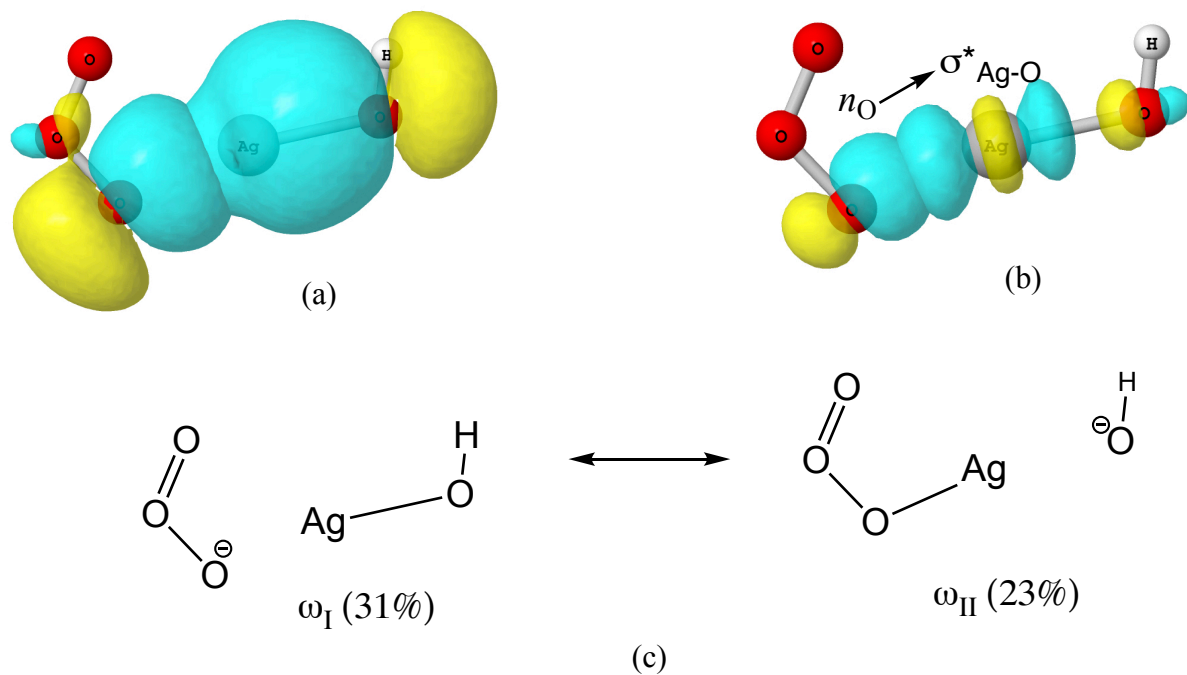

**Figure S15.** (a) 3-d surface views of leading 3c/4e Lewis-type NBOs (b) lone-pair NBO of O ( $n_{\text{O}}$ ) and empty  $\sigma^*$  NBO of Ag-O bond donor-acceptor pair (c) resonance structures with weights ( $\omega$ ) for  $\text{AgO}_4\text{H}^-$  cluster.

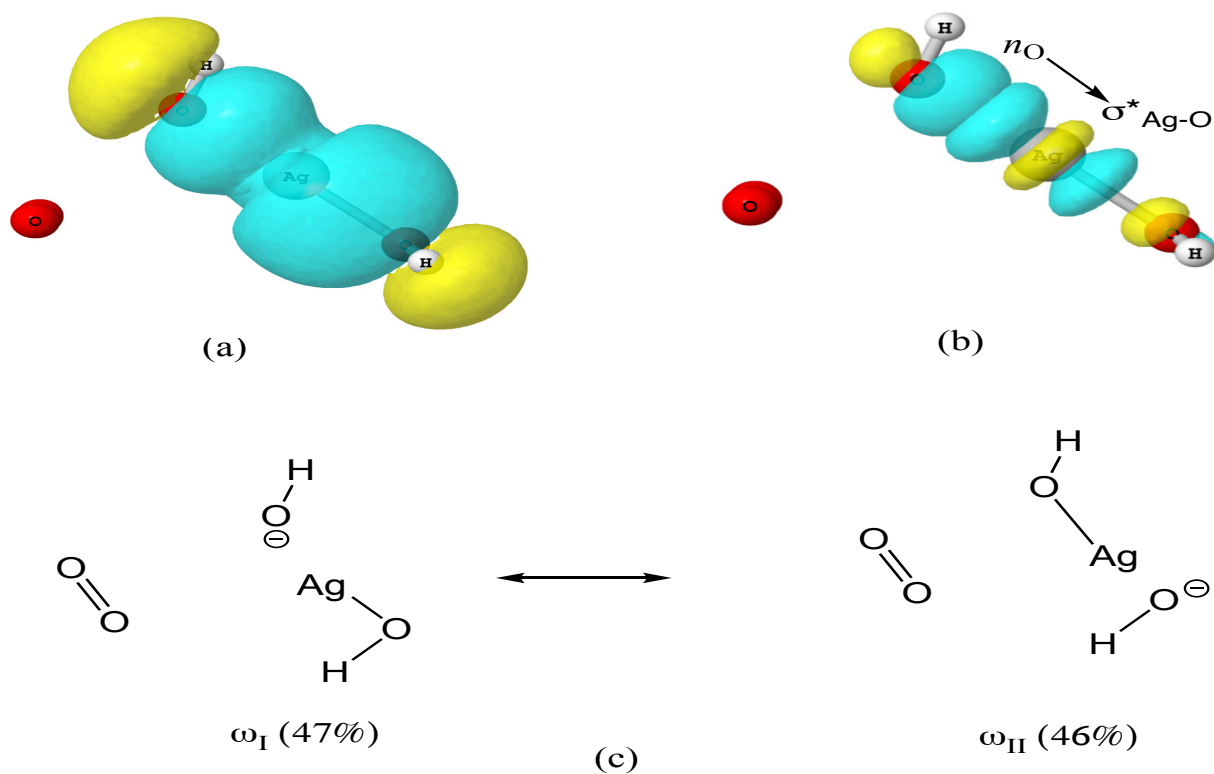

**Figure S16.** (a) 3-d surface views of leading 3c/4e Lewis-type NBOs (b) lone-pair NBO of O ( $n_{\text{O}}$ ) and empty  $\sigma^*$  NBO of Ag-O bond donor-acceptor pair (c) resonance structures with weights ( $\omega$ ) for  $\text{AgO}_4\text{H}_2^-$  cluster.

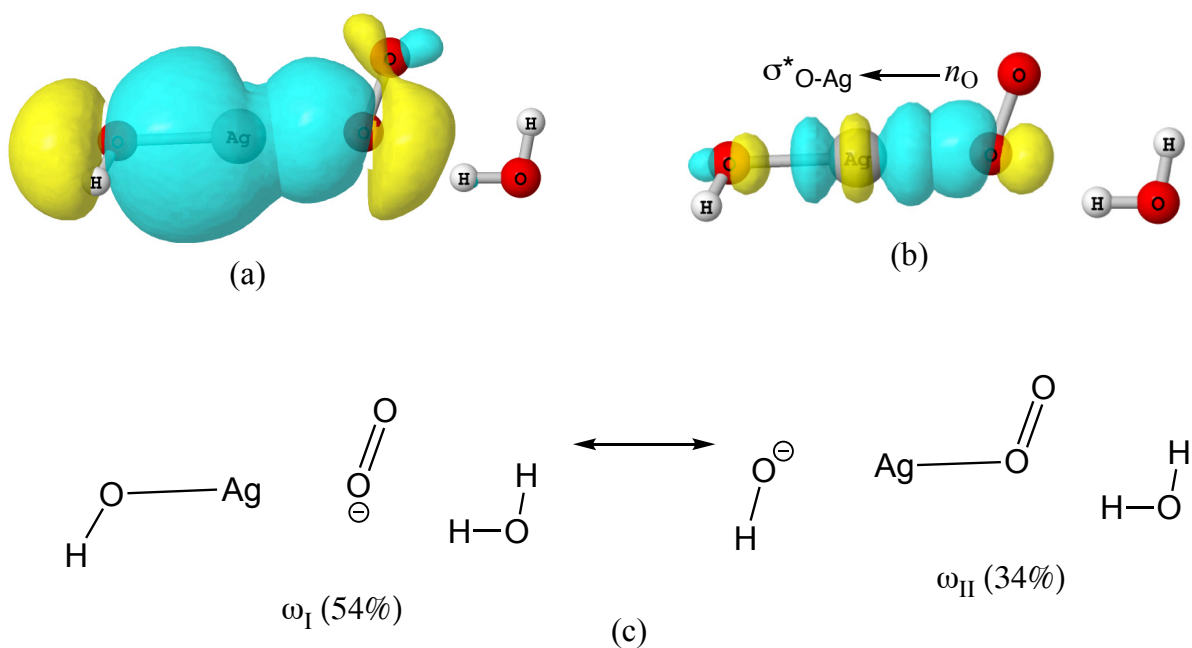

**Figure S17.** (a) 3-d surface views of leading 3c/4e Lewis-type NBOs (b) lone-pair NBO of O ( $n_{\text{O}}$ ) and empty  $\sigma^*$  NBO of Ag-O bond donor-acceptor pair (c) resonance structures with weights ( $\omega$ ) for  $\text{AgO}_4\text{H}_3^-$  cluster.

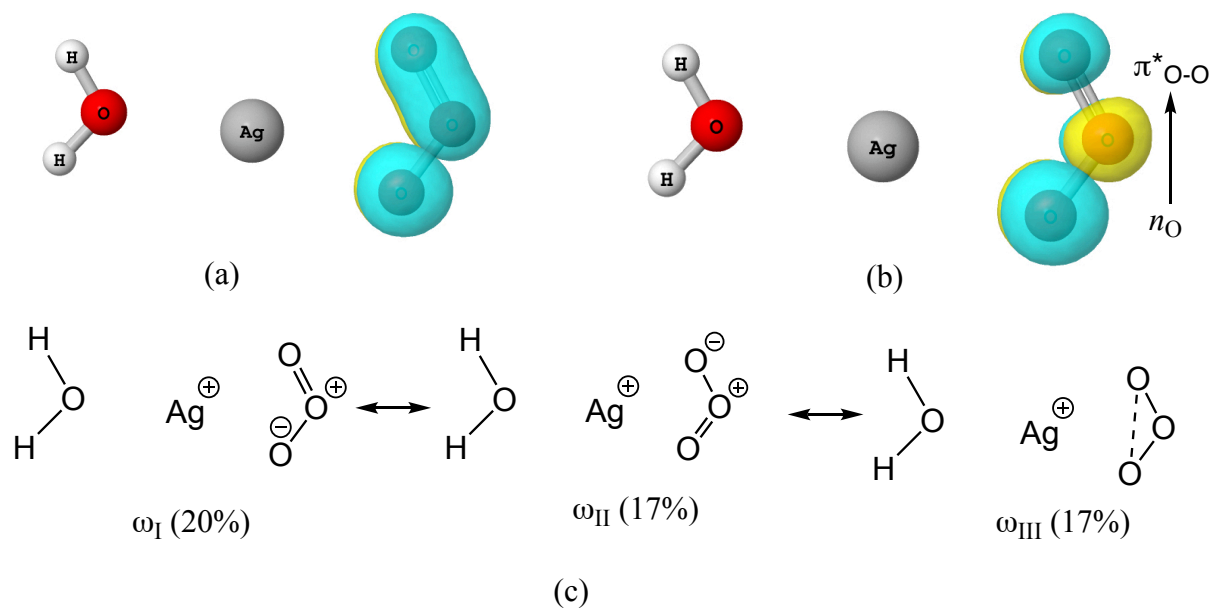

**Figure S18.** (a) 3-d surface views of leading 3c/4e Lewis-type NBOs (b) lone-pair NBO of O ( $n_{\text{O}}$ ) and empty  $\pi^*$  NBO of O-O bond donor-acceptor pair (c) resonance structures with weights ( $\omega$ ) for  $\text{AgO}_4\text{H}_2^+$  cluster.

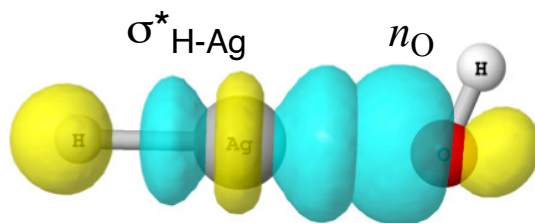

(a)

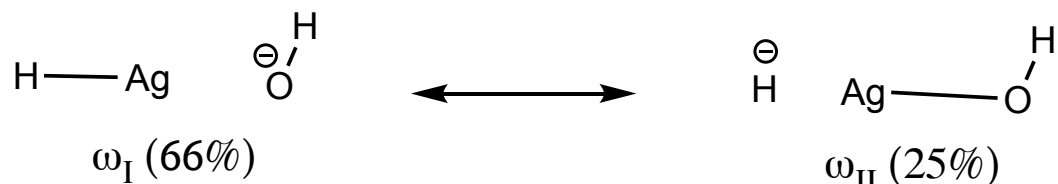

(b)

**Figure S19.** (a) Lone-pair NBO of O ( $n_{\text{O}}$ ) and empty  $\sigma^*$  NBO of Ag-H bond donor-acceptor pair (b) resonance structures with weights ( $\omega$ ) for  $\text{AgOH}_2^-$  cluster.

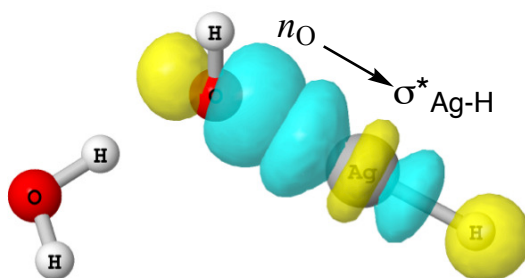

(a)

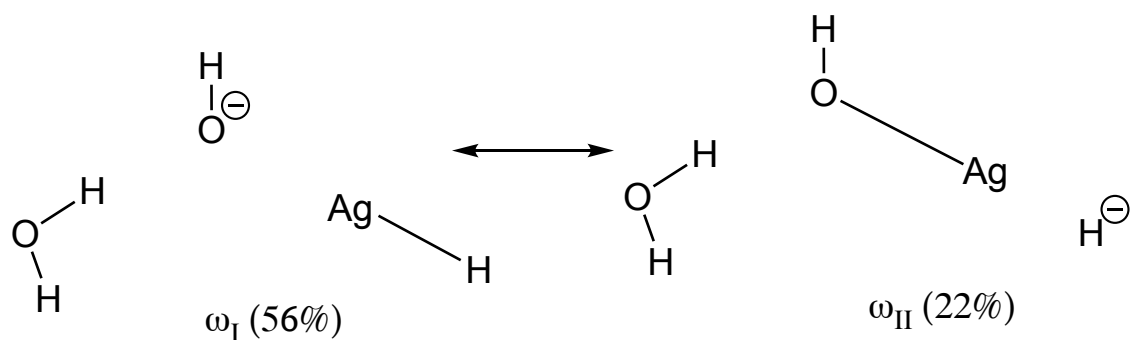

(b)

**Figure S20.** (a) Lone-pair NBO of O ( $n_{\text{O}}$ ) and empty  $\sigma^*$  NBO of Ag-H bond donor-acceptor pair (b) resonance structures with weights ( $\omega$ ) for  $\text{AgO}_2\text{H}_4^-$  cluster.

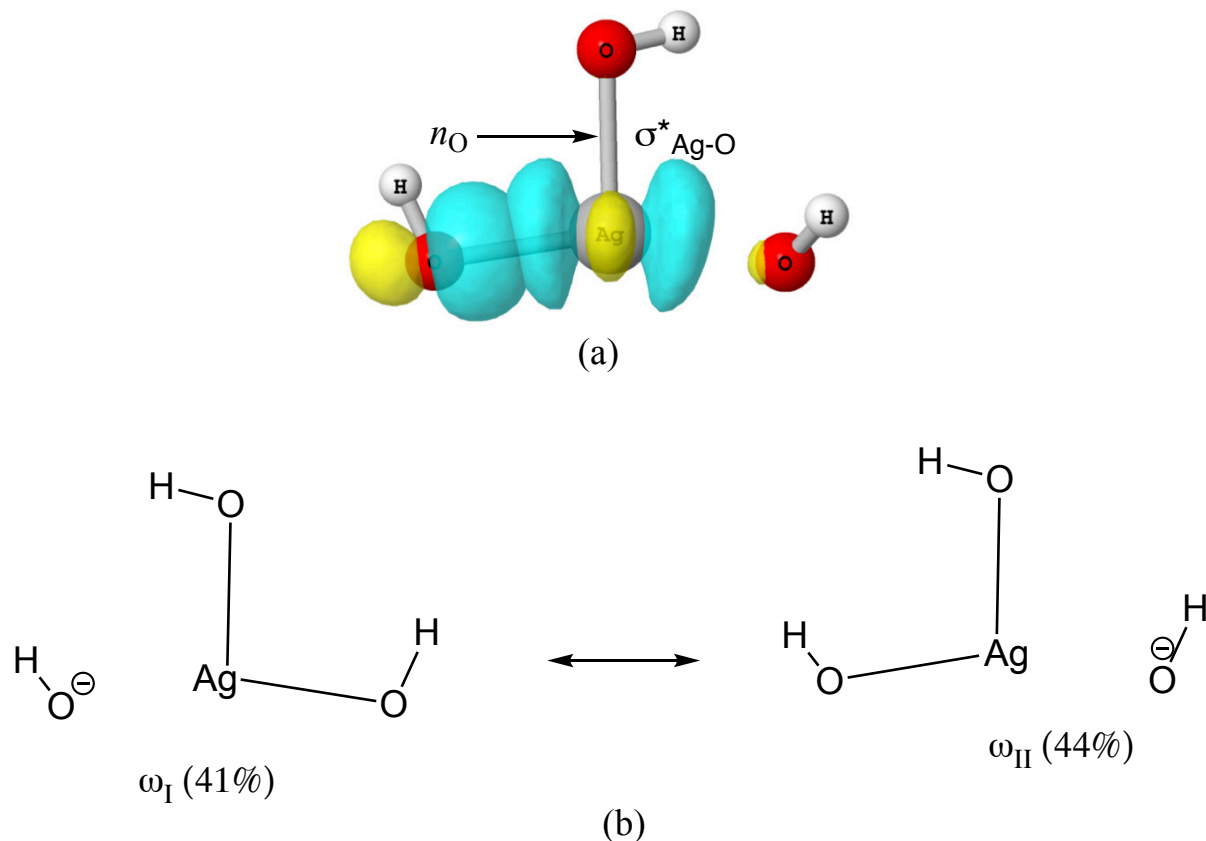

**Figure S21.** (a) Lone-pair NBO of O ( $n_O$ ) and empty  $\sigma^*$  NBO of Ag-O bond donor-acceptor pair (b) resonance structures with weights ( $\omega$ ) for  $\text{AgO}_3\text{H}_3^-$  cluster.

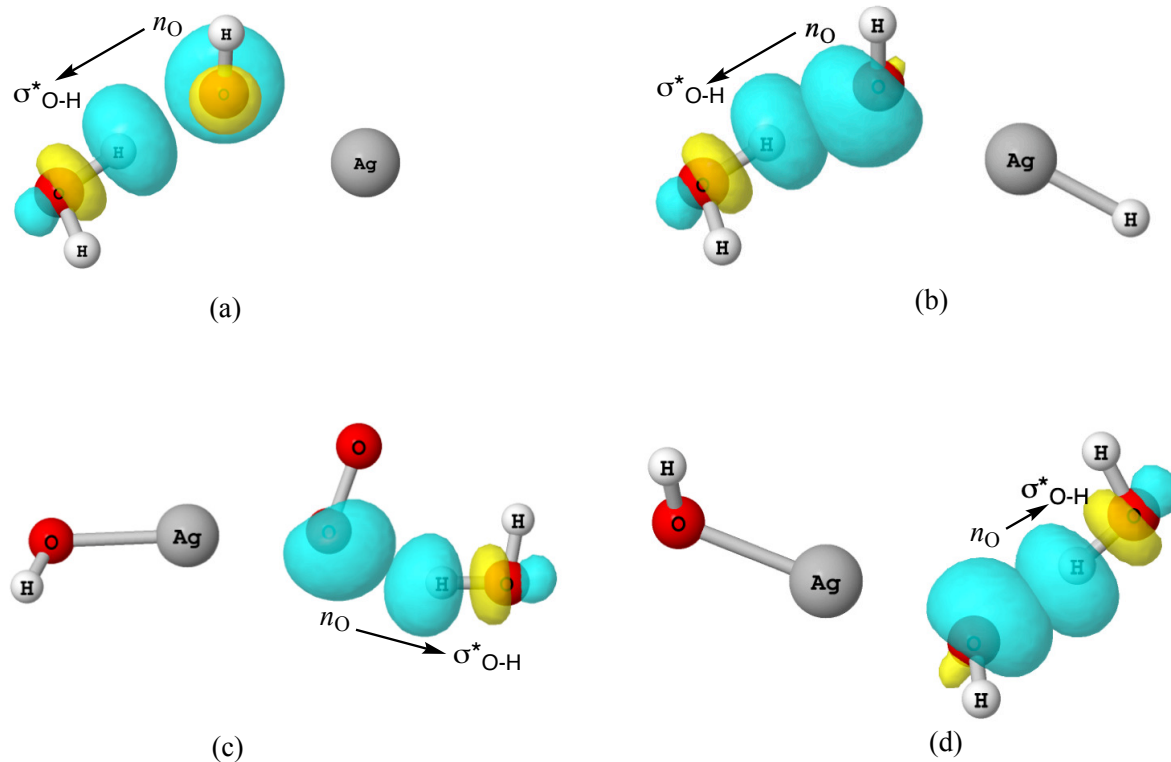

**Figure S22.** Lone-pair NBO of O ( $n_O$ ) and empty  $\sigma^*$  NBO of O-H bond donor-acceptor pair interactions leading to hydrogen bonding in (a)  $\text{AgO}_2\text{H}_3^-$  (b)  $\text{AgO}_2\text{H}_4^-$  (c)  $\text{AgO}_4\text{H}_3^-$  and (d)  $\text{AgO}_3\text{H}_4^-$  clusters.

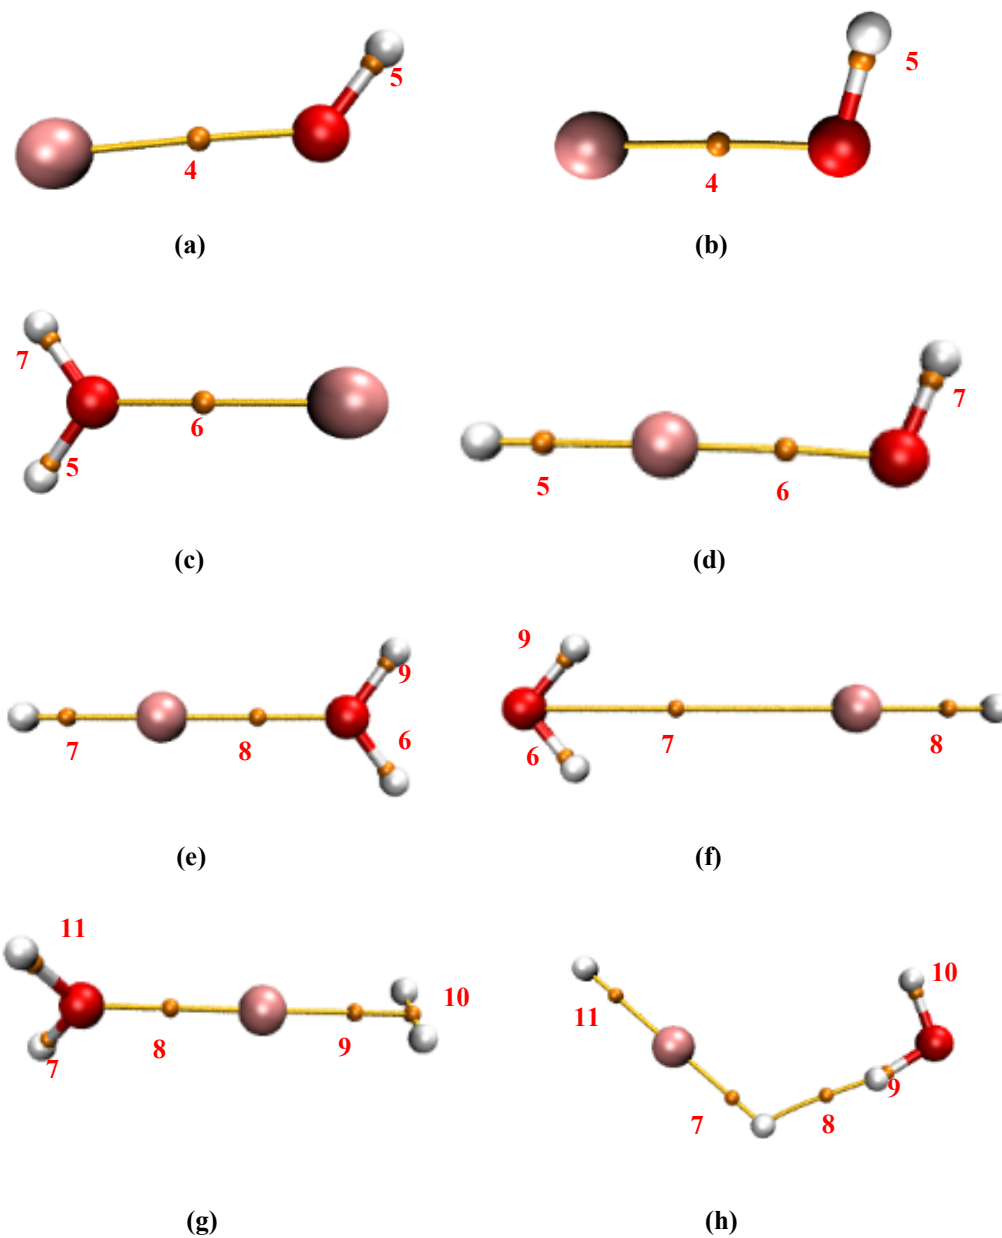

**Figure S23.** AIM trajectories for (a)  $\text{AgOH}^+$ ; (b)  $\text{AgOH}^-$ ; (c)  $\text{AgOH}_2^+$ ; (d)  $\text{AgOH}_2^-$ ; (e)  $\text{AgOH}_3^+$ ; (f)  $\text{AgOH}_3^-$ ; (g)  $\text{AgOH}_4^+$ ; and (h)  $\text{AgOH}_4^-$  calculated at the  $\omega\text{B97XD}$  level. Numbers are located at bond critical point (3,-1).

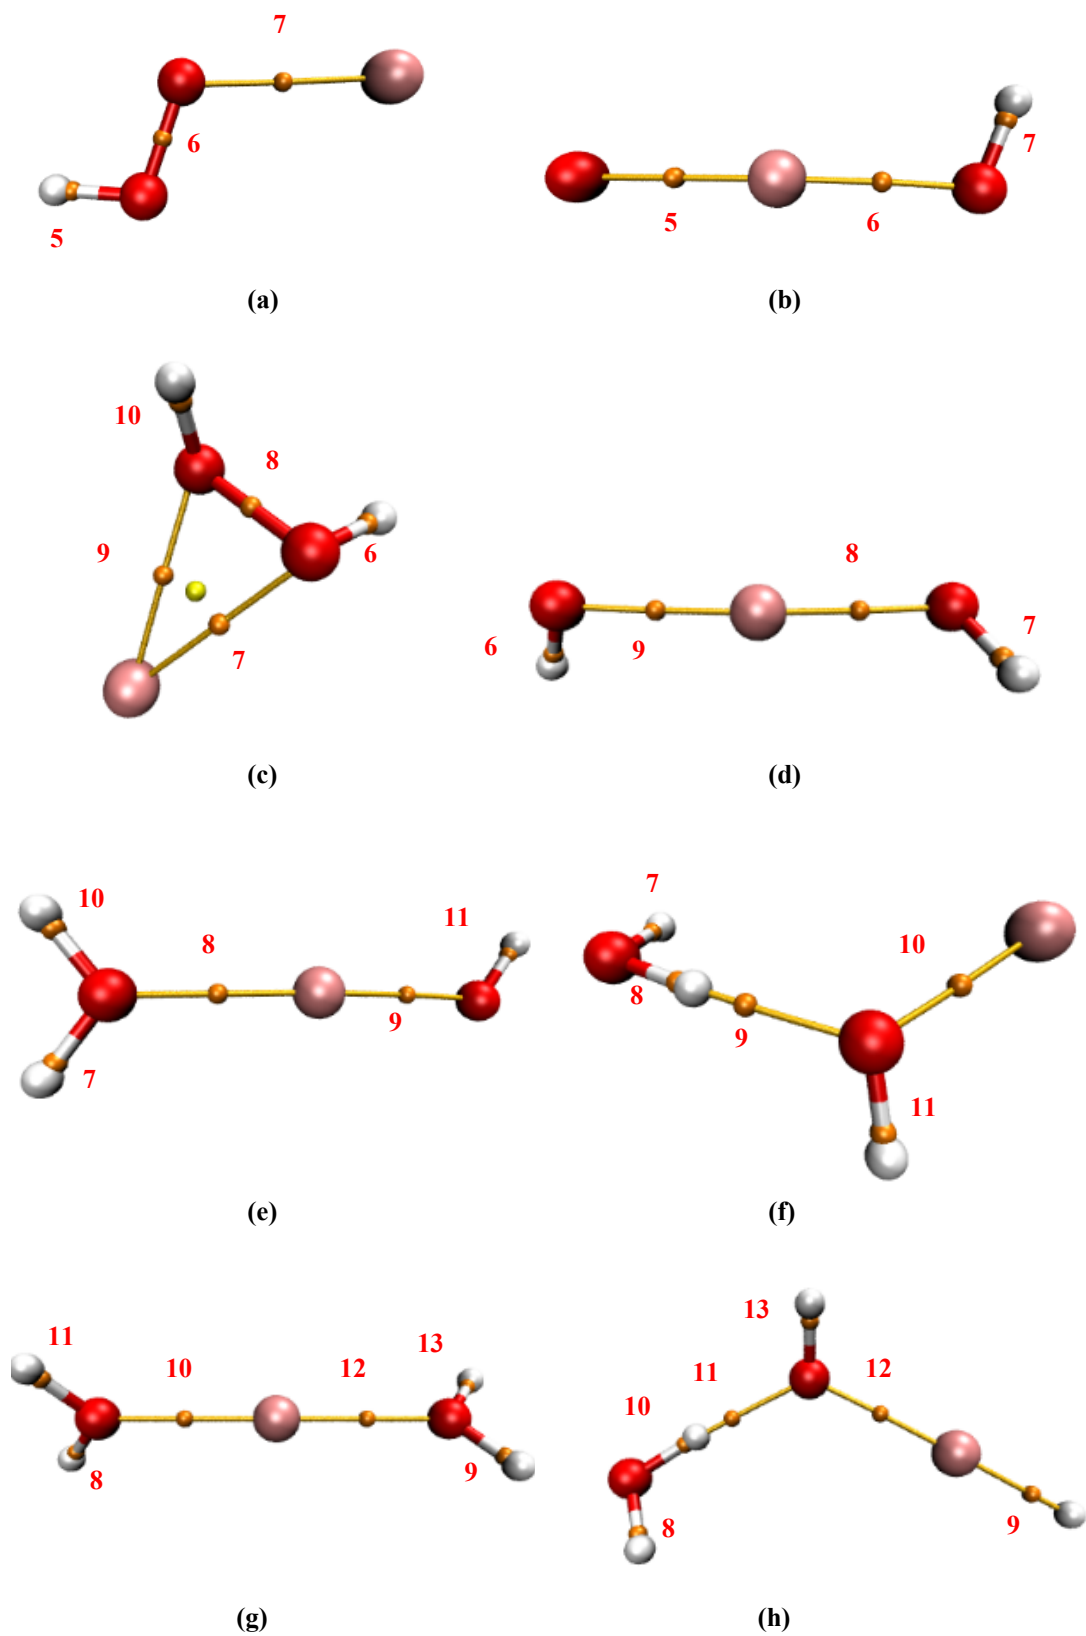

**Figure S24.** AIM trajectories for (a)  $\text{AgO}_2\text{H}^+$ ; (b)  $\text{AgO}_2\text{H}^-$ ; (c)  $\text{AgO}_2\text{H}_2^+$ ; (d)  $\text{AgO}_2\text{H}_2^-$ ; (e)  $\text{AgO}_2\text{H}_3^+$ ; (f)  $\text{AgO}_2\text{H}_3^-$ ; (g)  $\text{AgO}_2\text{H}_4^+$ ; and (h)  $\text{AgO}_2\text{H}_4^-$  calculated at the  $\omega\text{B97XD}$  level. Numbers are located at bond critical point (3,-1).

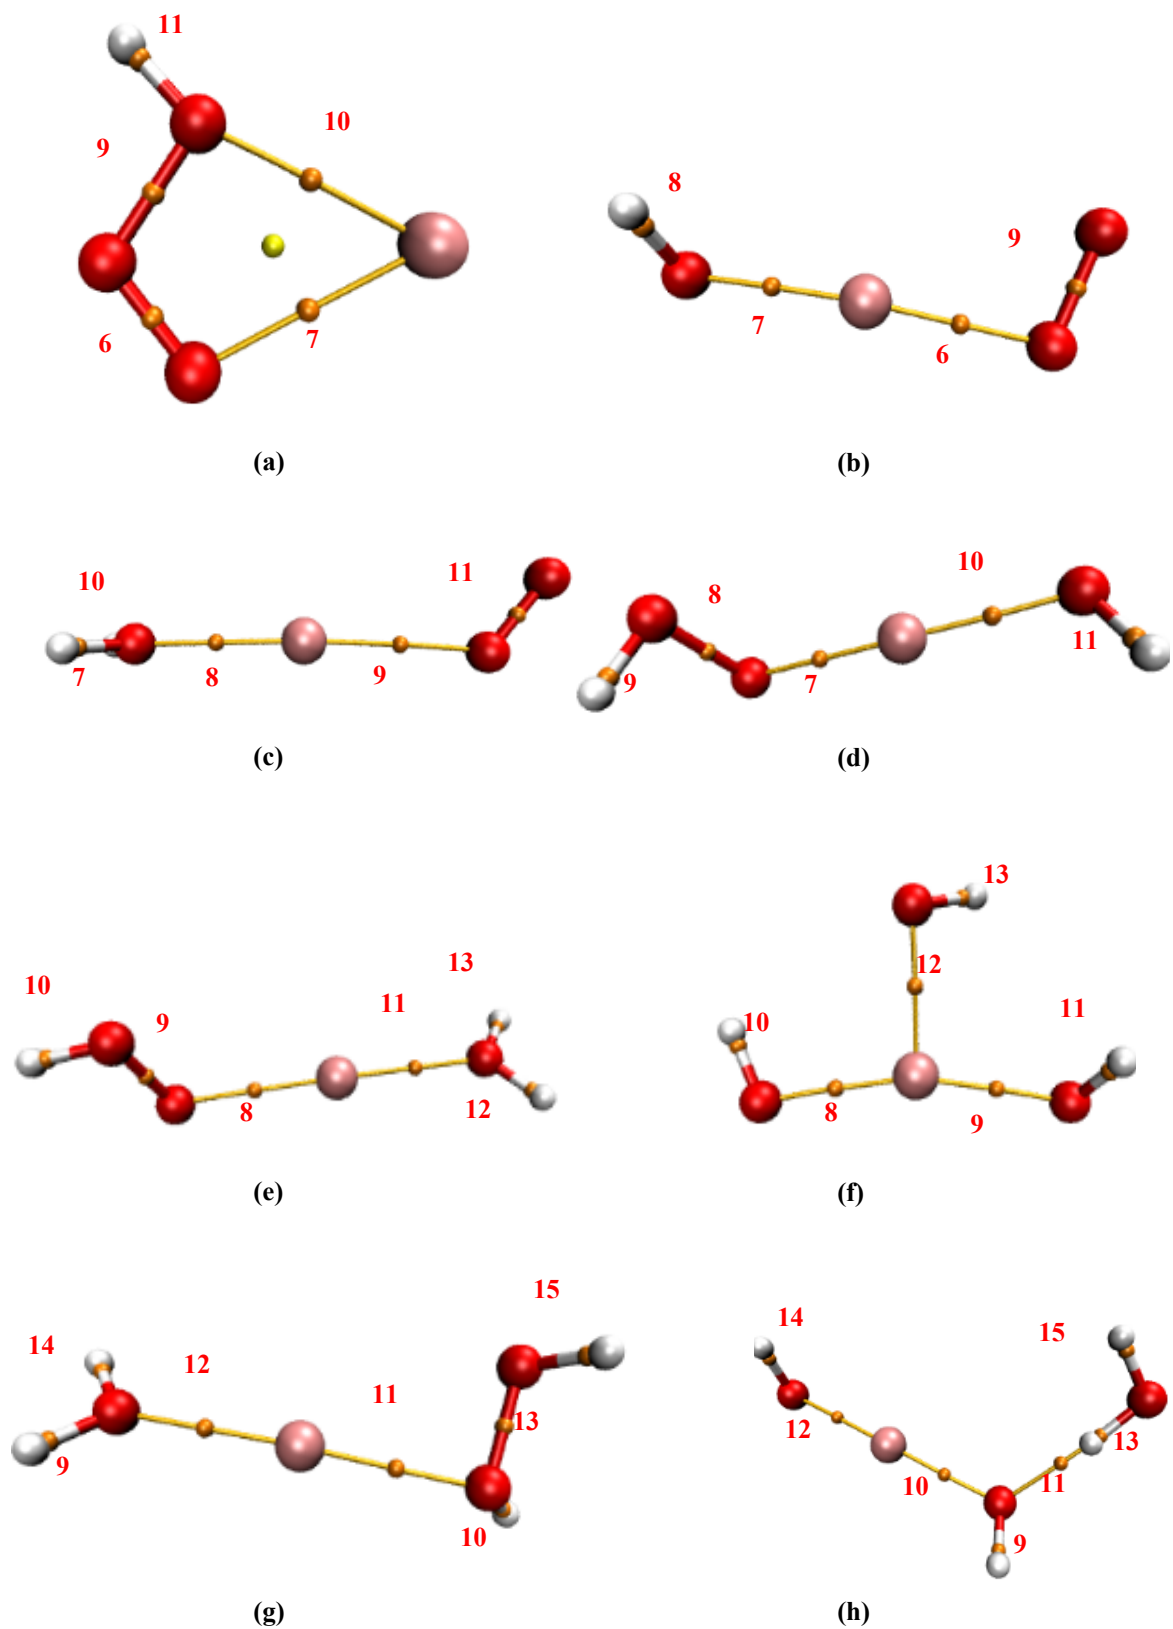

**Figure S25.** AIM trajectories for (a)  $\text{AgO}_3\text{H}^+$ ; (b)  $\text{AgO}_3\text{H}^-$ ; (c)  $\text{AgO}_3\text{H}_2^+$ ; (d)  $\text{AgO}_3\text{H}_2^-$ ; (e)  $\text{AgO}_3\text{H}_3^+$ ; (f)  $\text{AgO}_3\text{H}_3^-$ ; (g)  $\text{AgO}_3\text{H}_4^+$ ; and (h)  $\text{AgO}_3\text{H}_4^-$  calculated at the  $\omega\text{B97XD}$  level. Numbers are located at bond critical point (3,-1).



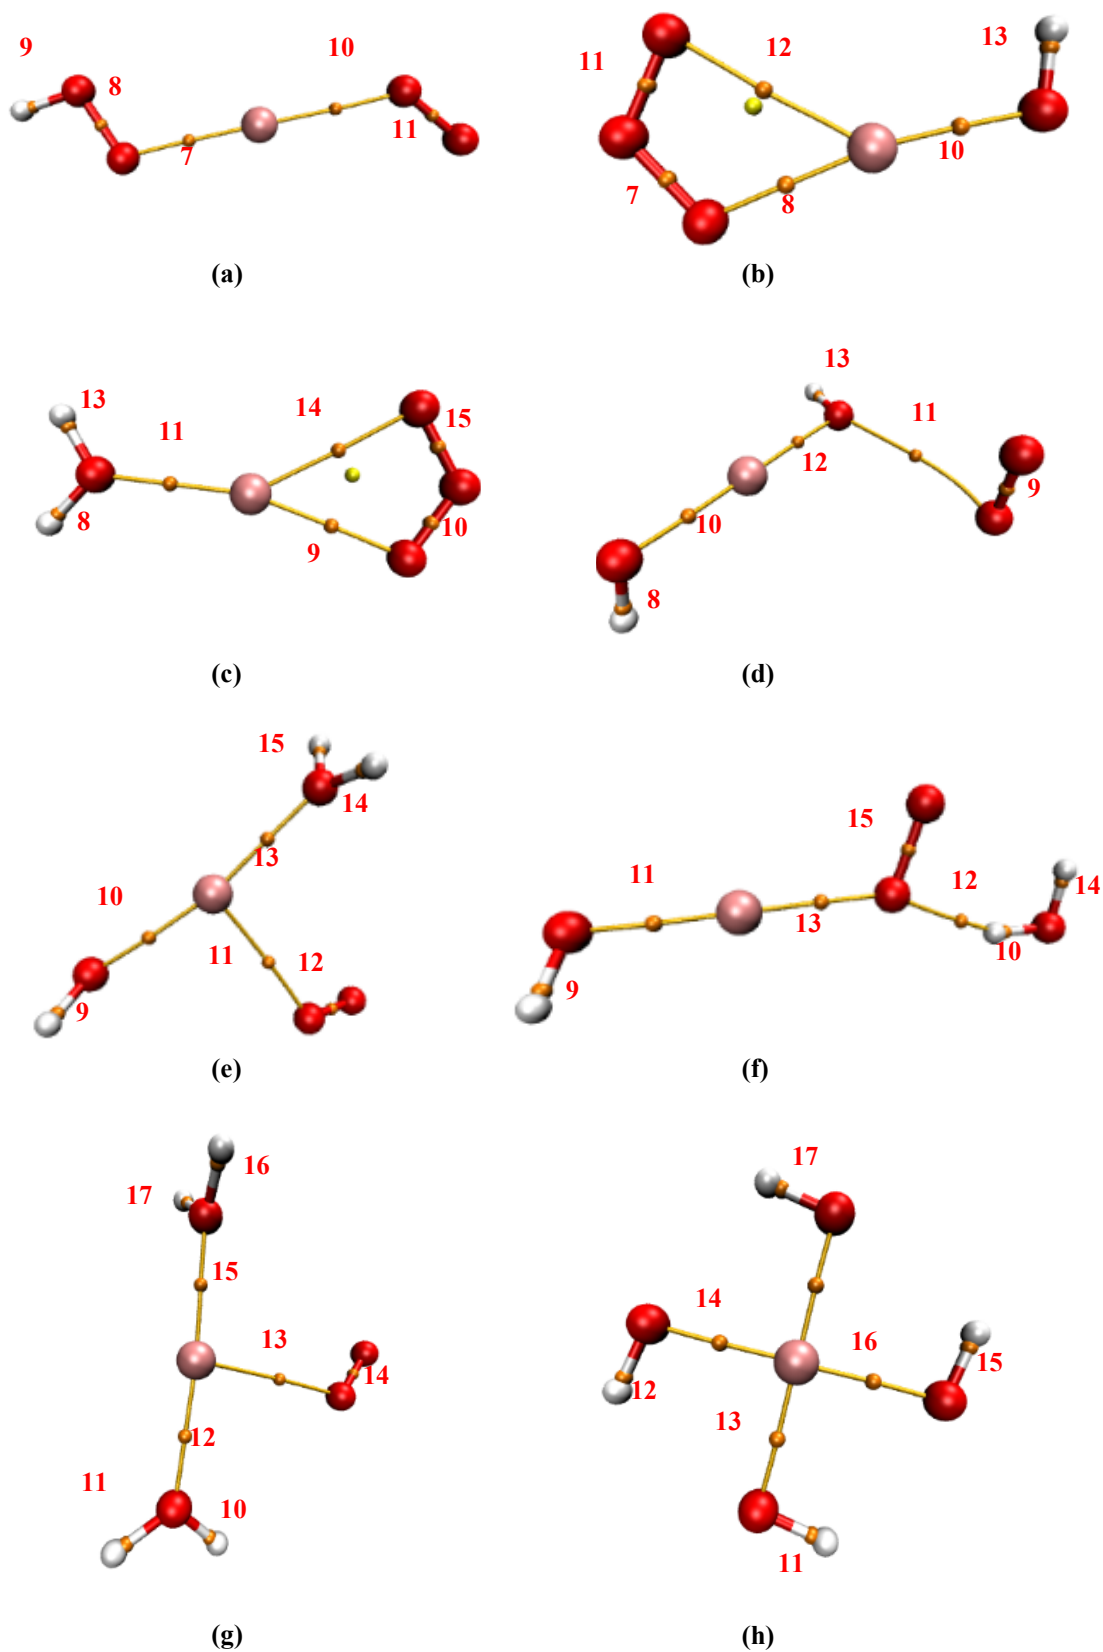

**Figure S26.** AIM trajectories for (a)  $\text{AgO}_4\text{H}^+$ ; (b)  $\text{AgO}_4\text{H}^-$ ; (c)  $\text{AgO}_4\text{H}_2^+$ ; (d)  $\text{AgO}_4\text{H}_2^-$ ; (e)  $\text{AgO}_4\text{H}_3^+$ ; (f)  $\text{AgO}_4\text{H}_3^-$ ; (g)  $\text{AgO}_4\text{H}_4^+$ ; and (h)  $\text{AgO}_4\text{H}_4^-$  calculated at the  $\omega\text{B97XD}$  level. Numbers are located at bond critical point (3,-1).
